# Supplementary material for: Single Nucleotide Polymorphism Discovery in Bovine Pituitary Gland Using RNA-Seq Technology
Source: PLoS One. 2016 Sep 8;11(9):e0161370. doi: 10.1371/journal.pone.0161370 (PMC5015895; doi:10.1371/journal.pone.0161370)
Supplement: S6 Table — (XLSX) [file pone.0161370.s006.xlsx]

## Sheet: SNP
sTable 6: RNA-seq SNP-db of bovine pituitary gland tissue of young bull-6 of Hereford cattle aged 12 months.
reference	location	ref_seq	sample seq	# of reads as Ref	# of reads as SNP	% ref	% SNP
gnl|Btau_4.6.1|chrY	2523967	A	G	0	2	0	1
gnl|Btau_4.6.1|chrY	2534342	A	G	0	2	0	1
gnl|Btau_4.6.1|chrY	2561866	T	G	0	2	0	1
gnl|Btau_4.6.1|chrY	2567952	G	C	0	2	0	1
gnl|Btau_4.6.1|chrY	2568457	G	T	30	8	0.789474	0.210526
gnl|Btau_4.6.1|chrY	2799213	A	G	0	2	0	1
gnl|Btau_4.6.1|chrY	2799218	A	G	0	2	0	1
gnl|Btau_4.6.1|chrY	2799219	A	G	0	2	0	1
gnl|Btau_4.6.1|chrY	2799220	A	G	0	2	0	1
gnl|Btau_4.6.1|chrY	2799275	A	G	1	2	0.333333	0.666667
gnl|Btau_4.6.1|chrY	2799284	A	G	0	2	0	1
gnl|Btau_4.6.1|chrY	2799429	A	G	2	2	0.5	0.5
gnl|Btau_4.6.1|chrY	2853295	C	A	0	2	0	1
gnl|Btau_4.6.1|chrY	2853363	T	A	0	2	0	1
gnl|Btau_4.6.1|chrY	2853369	C	A	0	2	0	1
gnl|Btau_4.6.1|chrY	2910126	A	C	9	2	0.818182	0.181818
gnl|Btau_4.6.1|chrY	2915874	G	T	2	2	0.5	0.5
gnl|Btau_4.6.1|chrY	2916815	A	G	2	2	0.5	0.5
gnl|Btau_4.6.1|chrY	2918479	C	A	0	1	0	1
gnl|Btau_4.6.1|chrY	2924763	T	C	0	2	0	1
gnl|Btau_4.6.1|chrY	2959461	T	C	0	2	0	1
gnl|Btau_4.6.1|chrY	3126861	C	T	0	27	0	1
gnl|Btau_4.6.1|chrY	3126898	A	G	1	24	0.04	0.96
gnl|Btau_4.6.1|chrY	3126915	C	T	1	21	0.0454545	0.954545
gnl|Btau_4.6.1|chrY	3126928	C	T	1	21	0.0454545	0.954545
gnl|Btau_4.6.1|chrY	3126932	C	T	1	21	0.0454545	0.954545
gnl|Btau_4.6.1|chrY	3731652	A	G	10	2	0.833333	0.166667
gnl|Btau_4.6.1|chrY	3735223	T	C	0	2	0	1
gnl|Btau_4.6.1|chrY	3735322	T	C	0	3	0	1
gnl|Btau_4.6.1|chrY	3735335	T	C	1	2	0.333333	0.666667
gnl|Btau_4.6.1|chrY	3736750	T	C	2	2	0.5	0.5
gnl|Btau_4.6.1|chrY	3736778	T	C	1	3	0.25	0.75
gnl|Btau_4.6.1|chrY	3736789	T	C	2	2	0.5	0.5
gnl|Btau_4.6.1|chrY	3750058	T	C	7	2	0.777778	0.222222
gnl|Btau_4.6.1|chrY	3750764	G	A	1	2	0.333333	0.666667
gnl|Btau_4.6.1|chrY	6629474	T	G	2	2	0.5	0.5
gnl|Btau_4.6.1|chrY	6629600	C	A	4	2	0.666667	0.333333
gnl|Btau_4.6.1|chrY	6631502	C	A	9	3	0.75	0.25
gnl|Btau_4.6.1|chrY	6631574	C	A	2	2	0.5	0.5
gnl|Btau_4.6.1|chrY	6636160	A	T	1	2	0.333333	0.666667
gnl|Btau_4.6.1|chrY	6639476	C	A	0	2	0	1
gnl|Btau_4.6.1|chrY	6648323	C	A	0	2	0	1
gnl|Btau_4.6.1|chrY	9453639	C	G	0	18	0	1
gnl|Btau_4.6.1|chrY	9453826	A	G	0	15	0	1
gnl|Btau_4.6.1|chrY	42376830	A	T	11	2	0.846154	0.153846
gnl|Btau_4.6.1|chrY	42377921	A	G	2	4	0.333333	0.666667
gnl|Btau_4.6.1|chrY	42377925	A	G	3	3	0.5	0.5
gnl|Btau_4.6.1|chrY	42377933	A	G	3	3	0.5	0.5
gnl|Btau_4.6.1|chrY	42377974	A	G	4	3	0.571429	0.428571
gnl|Btau_4.6.1|chrY	42377987	A	G	4	3	0.571429	0.428571
gnl|Btau_4.6.1|chrY	42377993	A	G	3	2	0.6	0.4
gnl|Btau_4.6.1|chrY	42377999	A	G	3	2	0.6	0.4
gnl|Btau_4.6.1|chrY	42378005	A	G	4	2	0.666667	0.333333
gnl|Btau_4.6.1|chrY	42378027	A	G	3	2	0.6	0.4
gnl|Btau_4.6.1|chrY	42378037	A	G	3	5	0.375	0.625
gnl|Btau_4.6.1|chrY	42378058	A	G	2	5	0.285714	0.714286
gnl|Btau_4.6.1|chrY	42378059	A	G	2	5	0.285714	0.714286
gnl|Btau_4.6.1|chrY	42378060	A	G	1	4	0.2	0.8
gnl|Btau_4.6.1|chrY	42378062	A	G	4	3	0.571429	0.428571
gnl|Btau_4.6.1|chrY	42378063	A	G	4	3	0.571429	0.428571
gnl|Btau_4.6.1|chrY	42378101	A	G	5	5	0.5	0.5
gnl|Btau_4.6.1|chrY	42378104	A	G	6	3	0.666667	0.333333
gnl|Btau_4.6.1|chrY	42378107	A	G	1	9	0.1	0.9
gnl|Btau_4.6.1|chrY	42378108	A	G	6	3	0.666667	0.333333
gnl|Btau_4.6.1|chrY	42378118	A	G	8	2	0.8	0.2
gnl|Btau_4.6.1|chrY	42378122	A	G	3	6	0.333333	0.666667
gnl|Btau_4.6.1|chrY	42378129	A	G	4	5	0.444444	0.555556
gnl|Btau_4.6.1|chrY	42378134	A	G	4	5	0.444444	0.555556
gnl|Btau_4.6.1|chrY	42378135	A	G	7	2	0.777778	0.222222
gnl|Btau_4.6.1|chrY	42378142	A	G	6	2	0.75	0.25
gnl|Btau_4.6.1|chrY	42378143	A	G	6	2	0.75	0.25
gnl|Btau_4.6.1|chrY	42378154	A	G	3	2	0.6	0.4
gnl|Btau_4.6.1|chrY	42378156	A	G	2	3	0.4	0.6
gnl|Btau_4.6.1|chrY	42378189	A	G	1	2	0.333333	0.666667
gnl|Btau_4.6.1|chrY	42378203	A	G	1	1	0.5	0.5
gnl|Btau_4.6.1|chrY	42378304	A	G	0	2	0	1
gnl|Btau_4.6.1|chrY	42379143	A	G	2	2	0.5	0.5
gnl|Btau_4.6.1|chrY	42379146	A	G	2	2	0.5	0.5
gnl|Btau_4.6.1|chrY	42379172	A	G	3	2	0.6	0.4
gnl|Btau_4.6.1|chrY	42379230	A	G	1	2	0.333333	0.666667
gnl|Btau_4.6.1|chrY	42379232	A	G	1	2	0.333333	0.666667
gnl|Btau_4.6.1|chrY	42379281	A	G	1	2	0.333333	0.666667
gnl|Btau_4.6.1|chrY	42379301	A	G	2	2	0.5	0.5
gnl|Btau_4.6.1|chrY	42379316	A	G	2	2	0.5	0.5
gnl|Btau_4.6.1|chrY	42379548	A	G	4	2	0.666667	0.333333
gnl|Btau_4.6.1|chrY	42379551	A	G	4	2	0.666667	0.333333
gnl|Btau_4.6.1|chrY	42379566	A	G	3	3	0.5	0.5
gnl|Btau_4.6.1|chrY	42379568	A	G	4	2	0.666667	0.333333
gnl|Btau_4.6.1|chrY	42379580	A	G	2	3	0.4	0.6
gnl|Btau_4.6.1|chrY	42379596	A	G	4	2	0.666667	0.333333
gnl|Btau_4.6.1|chrY	42379598	A	G	4	2	0.666667	0.333333
gnl|Btau_4.6.1|chrY	42379613	A	G	3	3	0.5	0.5
gnl|Btau_4.6.1|chrY	42379660	A	G	3	4	0.428571	0.571429
gnl|Btau_4.6.1|chrY	42379670	A	G	2	4	0.333333	0.666667
gnl|Btau_4.6.1|chrY	42379679	A	G	2	2	0.5	0.5
gnl|Btau_4.6.1|chrY	42384424	A	G	1	2	0.333333	0.666667
gnl|Btau_4.6.1|chrY	42384954	A	G	0	3	0	1
gnl|Btau_4.6.1|chrY	42384995	A	G	1	2	0.333333	0.666667
gnl|Btau_4.6.1|chrY	42385185	A	G	0	2	0	1
gnl|Btau_4.6.1|chrY	42385206	A	G	0	2	0	1
gnl|Btau_4.6.1|chrY	42385229	A	G	0	2	0	1
gnl|Btau_4.6.1|chrY	42385233	A	G	0	2	0	1
gnl|Btau_4.6.1|chrY	42385239	A	G	0	2	0	1
gnl|Btau_4.6.1|chrY	42385244	A	G	0	2	0	1
gnl|Btau_4.6.1|chrY	42397133	A	G	0	1	0	1
gnl|Btau_4.6.1|chrY	42397421	T	C	0	1	0	1
gnl|Btau_4.6.1|chrY	42424639	A	G	0	1	0	1
gnl|Btau_4.6.1|chrY	42425124	A	G	0	2	0	1
gnl|Btau_4.6.1|chrY	42425127	A	G	0	2	0	1
gnl|Btau_4.6.1|chrY	42425274	A	G	0	2	0	1
gnl|Btau_4.6.1|chrY	42425302	A	G	0	2	0	1
gnl|Btau_4.6.1|chrY	42425318	A	G	0	2	0	1
gnl|Btau_4.6.1|chrY	42425321	A	G	0	2	0	1
gnl|Btau_4.6.1|chrY	42425322	A	G	0	2	0	1
gnl|Btau_4.6.1|chrY	42425325	A	G	0	2	0	1
gnl|Btau_4.6.1|chrY	42425358	A	G	0	2	0	1
gnl|Btau_4.6.1|chrY	42425364	A	G	0	2	0	1
gnl|Btau_4.6.1|chrY	42425371	A	G	0	2	0	1
gnl|UMD3.1|GK000010.2	26130	C	T	0	2	0	1
gnl|UMD3.1|GK000010.2	26144	T	C	0	2	0	1
gnl|UMD3.1|GK000010.2	26145	G	C	0	2	0	1
gnl|UMD3.1|GK000010.2	242637	A	T	0	2	0	1
gnl|UMD3.1|GK000010.2	356391	G	A	1	2	0.333333	0.666667
gnl|UMD3.1|GK000010.2	369644	G	A	0	2	0	1
gnl|UMD3.1|GK000010.2	369692	T	C	1	2	0.333333	0.666667
gnl|UMD3.1|GK000010.2	385669	T	C	0	2	0	1
gnl|UMD3.1|GK000010.2	396112	T	C	0	2	0	1
gnl|UMD3.1|GK000010.2	397564	T	C	1	2	0.333333	0.666667
gnl|UMD3.1|GK000010.2	399713	A	G	0	4	0	1
gnl|UMD3.1|GK000010.2	399804	C	G	0	2	0	1
gnl|UMD3.1|GK000010.2	400027	C	G	0	2	0	1
gnl|UMD3.1|GK000010.2	400068	G	A	0	2	0	1
gnl|UMD3.1|GK000010.2	400521	A	C	2	3	0.4	0.6
gnl|UMD3.1|GK000010.2	401973	T	C	0	2	0	1
gnl|UMD3.1|GK000010.2	403058	A	G	0	2	0	1
gnl|UMD3.1|GK000010.2	403551	C	T	0	2	0	1
gnl|UMD3.1|GK000010.2	403952	G	T	0	2	0	1
gnl|UMD3.1|GK000010.2	403968	G	A	0	3	0	1
gnl|UMD3.1|GK000010.2	403993	C	T	0	3	0	1
gnl|UMD3.1|GK000010.2	404698	C	T	0	2	0	1
gnl|UMD3.1|GK000010.2	404719	G	C	0	2	0	1
gnl|UMD3.1|GK000010.2	404760	A	C	0	2	0	1
gnl|UMD3.1|GK000010.2	404763	G	T	0	2	0	1
gnl|UMD3.1|GK000010.2	404798	T	C	0	2	0	1
gnl|UMD3.1|GK000010.2	405936	A	G	0	3	0	1
gnl|UMD3.1|GK000010.2	405967	A	G	0	2	0	1
gnl|UMD3.1|GK000010.2	405977	C	T	1	2	0.333333	0.666667
gnl|UMD3.1|GK000010.2	407190	C	T	0	2	0	1
gnl|UMD3.1|GK000010.2	407231	T	G	0	3	0	1
gnl|UMD3.1|GK000010.2	407236	C	T	0	3	0	1
gnl|UMD3.1|GK000010.2	413334	G	T	0	2	0	1
gnl|UMD3.1|GK000010.2	415516	G	A	2	2	0.5	0.5
gnl|UMD3.1|GK000010.2	417850	C	T	0	2	0	1
gnl|UMD3.1|GK000010.2	419335	G	A	0	2	0	1
gnl|UMD3.1|GK000010.2	427832	A	G	0	2	0	1
gnl|UMD3.1|GK000010.2	431445	C	T	0	2	0	1
gnl|UMD3.1|GK000010.2	431488	T	C	0	2	0	1
gnl|UMD3.1|GK000010.2	431490	C	G	0	2	0	1
gnl|UMD3.1|GK000010.2	432381	C	A	0	2	0	1
gnl|UMD3.1|GK000010.2	435496	G	A	0	3	0	1
gnl|UMD3.1|GK000010.2	435829	C	T	0	1	0	1
gnl|UMD3.1|GK000010.2	437461	C	T	0	2	0	1
gnl|UMD3.1|GK000010.2	438003	C	T	0	2	0	1
gnl|UMD3.1|GK000010.2	438006	T	G	0	3	0	1
gnl|UMD3.1|GK000010.2	445897	G	C	1	2	0.333333	0.666667
gnl|UMD3.1|GK000010.2	445902	C	T	1	2	0.333333	0.666667
gnl|UMD3.1|GK000010.2	461180	C	G	1	2	0.333333	0.666667
gnl|UMD3.1|GK000010.2	461322	A	G	1	2	0.333333	0.666667
gnl|UMD3.1|GK000010.2	461330	G	C	1	3	0.25	0.75
gnl|UMD3.1|GK000010.2	461336	G	A	1	3	0.25	0.75
gnl|UMD3.1|GK000010.2	461424	G	A	0	4	0	1
gnl|UMD3.1|GK000010.2	461431	T	C	0	4	0	1
gnl|UMD3.1|GK000010.2	464247	G	A	0	2	0	1
gnl|UMD3.1|GK000010.2	475723	A	G	0	2	0	1
gnl|UMD3.1|GK000010.2	476917	G	A	2	2	0.5	0.5
gnl|UMD3.1|GK000010.2	476962	T	A	2	2	0.5	0.5
gnl|UMD3.1|GK000010.2	481741	G	A	0	2	0	1
gnl|UMD3.1|GK000010.2	483658	T	C	0	2	0	1
gnl|UMD3.1|GK000010.2	486094	A	G	0	2	0	1
gnl|UMD3.1|GK000010.2	486138	T	C	0	3	0	1
gnl|UMD3.1|GK000010.2	486141	T	C	0	3	0	1
gnl|UMD3.1|GK000010.2	489647	C	A	0	2	0	1
gnl|UMD3.1|GK000010.2	489676	G	C	0	2	0	1
gnl|UMD3.1|GK000010.2	495607	T	C	0	2	0	1
gnl|UMD3.1|GK000010.2	497138	T	A	0	2	0	1
gnl|UMD3.1|GK000010.2	498872	T	C	0	2	0	1
gnl|UMD3.1|GK000010.2	506868	G	A	0	2	0	1
gnl|UMD3.1|GK000010.2	516975	A	G	0	2	0	1
gnl|UMD3.1|GK000010.2	522142	T	C	2	2	0.5	0.5
gnl|UMD3.1|GK000010.2	524942	A	G	0	2	0	1
gnl|UMD3.1|GK000010.2	524943	A	G	0	2	0	1
gnl|UMD3.1|GK000010.2	529958	C	T	1	2	0.333333	0.666667
gnl|UMD3.1|GK000010.2	530005	A	G	1	2	0.333333	0.666667
gnl|UMD3.1|GK000010.2	530006	A	G	1	2	0.333333	0.666667
gnl|UMD3.1|GK000010.2	530010	A	G	1	2	0.333333	0.666667
gnl|UMD3.1|GK000010.2	530305	A	G	2	2	0.5	0.5
gnl|UMD3.1|GK000010.2	530307	A	G	2	2	0.5	0.5
gnl|UMD3.1|GK000010.2	545443	A	G	0	2	0	1
gnl|UMD3.1|GK000010.2	549886	G	A	1	2	0.333333	0.666667
gnl|UMD3.1|GK000010.2	553073	A	G	2	2	0.5	0.5
gnl|UMD3.1|GK000010.2	553106	A	G	6	2	0.75	0.25
gnl|UMD3.1|GK000010.2	553387	C	T	0	2	0	1
gnl|UMD3.1|GK000010.2	554412	A	G	2	2	0.5	0.5
gnl|UMD3.1|GK000010.2	554415	A	G	0	4	0	1
gnl|UMD3.1|GK000010.2	554418	A	G	2	2	0.5	0.5
gnl|UMD3.1|GK000010.2	554455	A	G	2	2	0.5	0.5
gnl|UMD3.1|GK000010.2	554457	A	G	2	2	0.5	0.5
gnl|UMD3.1|GK000010.2	554469	A	G	2	2	0.5	0.5
gnl|UMD3.1|GK000010.2	554500	A	G	2	2	0.5	0.5
gnl|UMD3.1|GK000010.2	554530	C	T	0	2	0	1
gnl|UMD3.1|GK000010.2	555259	C	T	0	2	0	1
gnl|UMD3.1|GK000010.2	555260	A	G	0	2	0	1
gnl|UMD3.1|GK000010.2	555265	A	G	0	3	0	1
gnl|UMD3.1|GK000010.2	555292	C	A	2	7	0.222222	0.777778
gnl|UMD3.1|GK000010.2	555317	G	C	2	17	0.105263	0.894737
gnl|UMD3.1|GK000010.2	555363	G	A	2	26	0.0714286	0.928571
gnl|UMD3.1|GK000010.2	555424	T	C	0	33	0	1
gnl|UMD3.1|GK000010.2	555483	C	G	1	33	0.0294118	0.970588
gnl|UMD3.1|GK000010.2	555598	A	G	0	35	0	1
gnl|UMD3.1|GK000010.2	555632	A	G	1	43	0.0227273	0.977273
gnl|UMD3.1|GK000010.2	555657	T	C	1	31	0.03125	0.96875
gnl|UMD3.1|GK000010.2	555666	T	C	1	33	0.0294118	0.970588
gnl|UMD3.1|GK000010.2	555684	A	G	1	28	0.0344828	0.965517
gnl|UMD3.1|GK000010.2	555780	G	A	2	6	0.25	0.75
gnl|UMD3.1|GK000010.2	555811	A	T	2	4	0.333333	0.666667
gnl|UMD3.1|GK000010.2	559178	T	C	1	2	0.333333	0.666667
gnl|UMD3.1|GK000010.2	560627	C	A	2	2	0.5	0.5
gnl|UMD3.1|GK000010.2	561325	A	G	1	2	0.333333	0.666667
gnl|UMD3.1|GK000010.2	564103	A	G	0	3	0	1
gnl|UMD3.1|GK000010.2	569280	G	A	1	3	0.25	0.75
gnl|UMD3.1|GK000010.2	570538	A	G	2	2	0.5	0.5
gnl|UMD3.1|GK000010.2	570575	A	G	3	2	0.6	0.4
gnl|UMD3.1|GK000010.2	570677	A	G	0	2	0	1
gnl|UMD3.1|GK000010.2	570684	A	G	0	2	0	1
gnl|UMD3.1|GK000010.2	570727	A	G	0	2	0	1
gnl|UMD3.1|GK000010.2	571580	C	A	4	2	0.666667	0.333333
gnl|UMD3.1|GK000010.2	575929	A	G	0	2	0	1
gnl|UMD3.1|GK000010.2	577782	A	G	1	2	0.333333	0.666667
gnl|UMD3.1|GK000010.2	577784	A	T	1	2	0.333333	0.666667
gnl|UMD3.1|GK000010.2	577804	A	G	0	3	0	1
gnl|UMD3.1|GK000010.2	583956	A	G	0	2	0	1
gnl|UMD3.1|GK000010.2	590041	G	A	0	2	0	1
gnl|UMD3.1|GK000010.2	590046	T	C	0	2	0	1
gnl|UMD3.1|GK000010.2	592536	G	T	0	2	0	1
gnl|UMD3.1|GK000010.2	600012	G	T	3	2	0.6	0.4
gnl|UMD3.1|GK000010.2	600049	G	A	2	2	0.5	0.5
gnl|UMD3.1|GK000010.2	602915	A	G	2	2	0.5	0.5
gnl|UMD3.1|GK000010.2	603000	A	G	0	2	0	1
gnl|UMD3.1|GK000010.2	603867	A	G	0	2	0	1
gnl|UMD3.1|GK000010.2	603873	A	G	0	2	0	1
gnl|UMD3.1|GK000010.2	603880	A	G	0	2	0	1
gnl|UMD3.1|GK000010.2	608513	C	A	1	2	0.333333	0.666667
gnl|UMD3.1|GK000010.2	613033	C	G	0	2	0	1
gnl|UMD3.1|GK000010.2	615556	G	T	0	2	0	1
gnl|UMD3.1|GK000010.2	615572	G	A	0	2	0	1
gnl|UMD3.1|GK000010.2	615594	T	C	0	2	0	1
gnl|UMD3.1|GK000010.2	616415	G	A	0	2	0	1
gnl|UMD3.1|GK000010.2	617525	C	T	0	10	0	1
gnl|UMD3.1|GK000010.2	617536	G	A	0	8	0	1
gnl|UMD3.1|GK000010.2	617550	G	A	0	10	0	1
gnl|UMD3.1|GK000010.2	618055	G	T	3	2	0.6	0.4
gnl|UMD3.1|GK000010.2	619714	G	T	1	2	0.333333	0.666667
gnl|UMD3.1|GK000010.2	620459	G	T	0	2	0	1
gnl|UMD3.1|GK000010.2	621497	G	C	1	3	0.25	0.75
gnl|UMD3.1|GK000010.2	621601	C	G	2	4	0.333333	0.666667
gnl|UMD3.1|GK000010.2	621645	C	T	1	3	0.25	0.75
gnl|UMD3.1|GK000010.2	622876	A	G	1	2	0.333333	0.666667
gnl|UMD3.1|GK000010.2	622937	C	T	5	3	0.625	0.375
gnl|UMD3.1|GK000010.2	624653	T	A	6	2	0.75	0.25
gnl|UMD3.1|GK000010.2	628672	G	A	3	6	0.333333	0.666667
gnl|UMD3.1|GK000010.2	628977	A	G	1	4	0.2	0.8
gnl|UMD3.1|GK000010.2	629169	G	A	2	5	0.285714	0.714286
gnl|UMD3.1|GK000010.2	631014	G	T	6	3	0.666667	0.333333
gnl|UMD3.1|GK000010.2	632130	A	G	9	2	0.818182	0.181818
gnl|UMD3.1|GK000010.2	632236	T	C	2	8	0.2	0.8
gnl|UMD3.1|GK000010.2	632280	T	C	1	10	0.0909091	0.909091
gnl|UMD3.1|GK000010.2	632357	A	T	3	10	0.230769	0.769231
gnl|UMD3.1|GK000010.2	632560	A	G	6	16	0.272727	0.727273
gnl|UMD3.1|GK000010.2	632610	G	A	4	15	0.210526	0.789474
gnl|UMD3.1|GK000010.2	632751	T	G	5	5	0.5	0.5
gnl|UMD3.1|GK000010.2	632760	G	A	5	5	0.5	0.5
gnl|UMD3.1|GK000010.2	632838	T	G	5	2	0.714286	0.285714
gnl|UMD3.1|GK000010.2	632839	A	G	5	2	0.714286	0.285714
gnl|UMD3.1|GK000010.2	632840	T	A	5	2	0.714286	0.285714
gnl|UMD3.1|GK000010.2	633008	G	A	3	4	0.428571	0.571429
gnl|UMD3.1|GK000010.2	633046	G	A	2	5	0.285714	0.714286
gnl|UMD3.1|GK000010.2	633057	C	A	4	2	0.666667	0.333333
gnl|UMD3.1|GK000010.2	633106	G	A	1	6	0.142857	0.857143
gnl|UMD3.1|GK000010.2	633121	A	G	1	7	0.125	0.875
gnl|UMD3.1|GK000010.2	633194	G	A	1	7	0.125	0.875
gnl|UMD3.1|GK000010.2	633326	G	A	1	4	0.2	0.8
gnl|UMD3.1|GK000010.2	633348	C	G	1	3	0.25	0.75
gnl|UMD3.1|GK000010.2	633540	C	T	0	3	0	1
gnl|UMD3.1|GK000010.2	633595	A	G	0	4	0	1
gnl|UMD3.1|GK000010.2	633738	G	A	1	3	0.25	0.75
gnl|UMD3.1|GK000010.2	633937	T	A	2	2	0.5	0.5
gnl|UMD3.1|GK000010.2	634144	A	G	5	2	0.714286	0.285714
gnl|UMD3.1|GK000010.2	634167	G	T	4	2	0.666667	0.333333
gnl|UMD3.1|GK000010.2	634169	C	T	4	2	0.666667	0.333333
gnl|UMD3.1|GK000010.2	634478	G	A	3	2	0.6	0.4
gnl|UMD3.1|GK000010.2	634699	C	T	2	5	0.285714	0.714286
gnl|UMD3.1|GK000010.2	634955	A	G	5	3	0.625	0.375
gnl|UMD3.1|GK000010.2	634972	G	A	5	3	0.625	0.375
gnl|UMD3.1|GK000010.2	635034	A	G	2	2	0.5	0.5
gnl|UMD3.1|GK000010.2	635065	A	C	2	2	0.5	0.5
gnl|UMD3.1|GK000010.2	635661	T	C	2	3	0.4	0.6
gnl|UMD3.1|GK000010.2	635662	G	A	3	2	0.6	0.4
gnl|UMD3.1|GK000010.2	635761	G	A	2	3	0.4	0.6
gnl|UMD3.1|GK000010.2	635792	A	C	0	3	0	1
gnl|UMD3.1|GK000010.2	636201	A	T	1	2	0.333333	0.666667
gnl|UMD3.1|GK000010.2	636223	C	T	1	2	0.333333	0.666667
gnl|UMD3.1|GK000010.2	636272	G	A	1	2	0.333333	0.666667
gnl|UMD3.1|GK000010.2	636515	A	C	2	2	0.5	0.5
gnl|UMD3.1|GK000010.2	637173	G	C	0	2	0	1
gnl|UMD3.1|GK000010.2	637662	G	T	5	2	0.714286	0.285714
gnl|UMD3.1|GK000010.2	638619	T	C	3	6	0.333333	0.666667
gnl|UMD3.1|GK000010.2	638649	T	C	3	6	0.333333	0.666667
gnl|UMD3.1|GK000010.2	638790	T	A	2	3	0.4	0.6
gnl|UMD3.1|GK000010.2	638829	C	T	2	2	0.5	0.5
gnl|UMD3.1|GK000010.2	638877	A	G	1	2	0.333333	0.666667
gnl|UMD3.1|GK000010.2	638905	C	T	1	3	0.25	0.75
gnl|UMD3.1|GK000010.2	639727	C	G	1	2	0.333333	0.666667
gnl|UMD3.1|GK000010.2	641060	T	C	1	2	0.333333	0.666667
gnl|UMD3.1|GK000010.2	642306	G	A	2	2	0.5	0.5
gnl|UMD3.1|GK000010.2	644197	A	G	3	2	0.6	0.4
gnl|UMD3.1|GK000010.2	644198	A	G	1	4	0.2	0.8
gnl|UMD3.1|GK000010.2	644257	A	G	5	3	0.625	0.375
gnl|UMD3.1|GK000010.2	644280	C	G	2	4	0.333333	0.666667
gnl|UMD3.1|GK000010.2	644310	A	G	2	4	0.333333	0.666667
gnl|UMD3.1|GK000010.2	644346	G	T	5	2	0.714286	0.285714
gnl|UMD3.1|GK000010.2	645653	A	G	2	3	0.4	0.6
gnl|UMD3.1|GK000010.2	649141	C	T	1	2	0.333333	0.666667
gnl|UMD3.1|GK000010.2	657536	A	T	1	2	0.333333	0.666667
gnl|UMD3.1|GK000010.2	657712	G	T	0	2	0	1
gnl|UMD3.1|GK000010.2	660819	C	T	1	2	0.333333	0.666667
gnl|UMD3.1|GK000010.2	666332	C	T	4	3	0.571429	0.428571
gnl|UMD3.1|GK000010.2	666368	G	T	2	3	0.4	0.6
gnl|UMD3.1|GK000010.2	666857	T	G	1	2	0.333333	0.666667
gnl|UMD3.1|GK000010.2	667260	G	T	1	3	0.25	0.75
gnl|UMD3.1|GK000010.2	667400	A	G	2	2	0.5	0.5
gnl|UMD3.1|GK000010.2	667941	G	T	3	2	0.6	0.4
gnl|UMD3.1|GK000010.2	670177	A	G	2	4	0.333333	0.666667
gnl|UMD3.1|GK000010.2	670220	G	A	1	4	0.2	0.8
gnl|UMD3.1|GK000010.2	671501	A	G	3	3	0.5	0.5
gnl|UMD3.1|GK000010.2	671652	C	T	5	3	0.625	0.375
gnl|UMD3.1|GK000010.2	671723	C	G	4	3	0.571429	0.428571
gnl|UMD3.1|GK000010.2	672039	G	A	0	2	0	1
gnl|UMD3.1|GK000010.2	672040	G	C	0	2	0	1
gnl|UMD3.1|GK000010.2	673727	G	T	1	2	0.333333	0.666667
gnl|UMD3.1|GK000010.2	679478	C	T	4	2	0.666667	0.333333
gnl|UMD3.1|GK000010.2	686054	G	C	0	4	0	1
gnl|UMD3.1|GK000010.2	686453	A	C	7	2	0.777778	0.222222
gnl|UMD3.1|GK000010.2	687106	A	G	1	2	0.333333	0.666667
gnl|UMD3.1|GK000010.2	690901	A	G	0	2	0	1
gnl|UMD3.1|GK000010.2	693198	C	T	1	4	0.2	0.8
gnl|UMD3.1|GK000010.2	693362	C	T	1	2	0.333333	0.666667
gnl|UMD3.1|GK000010.2	694217	T	C	1	3	0.25	0.75
gnl|UMD3.1|GK000010.2	694326	T	C	1	2	0.333333	0.666667
gnl|UMD3.1|GK000010.2	694429	T	C	1	3	0.25	0.75
gnl|UMD3.1|GK000010.2	694756	C	T	0	2	0	1
gnl|UMD3.1|GK000010.2	695116	G	T	1	2	0.333333	0.666667
gnl|UMD3.1|GK000010.2	697316	A	G	0	3	0	1
gnl|UMD3.1|GK000010.2	697337	A	G	0	3	0	1
gnl|UMD3.1|GK000010.2	698725	A	G	3	2	0.6	0.4
gnl|UMD3.1|GK000010.2	700925	T	A	0	2	0	1
gnl|UMD3.1|GK000010.2	700926	C	T	0	2	0	1
gnl|UMD3.1|GK000010.2	701498	T	A	5	2	0.714286	0.285714
gnl|UMD3.1|GK000010.2	707317	C	T	2	2	0.5	0.5
gnl|UMD3.1|GK000010.2	711679	G	C	3	4	0.428571	0.571429
gnl|UMD3.1|GK000010.2	713109	T	A	1	2	0.333333	0.666667
gnl|UMD3.1|GK000010.2	716576	G	A	0	2	0	1
gnl|UMD3.1|GK000010.2	717401	T	A	4	2	0.666667	0.333333
gnl|UMD3.1|GK000010.2	717408	G	A	2	4	0.333333	0.666667
gnl|UMD3.1|GK000010.2	717481	G	A	5	3	0.625	0.375
gnl|UMD3.1|GK000010.2	719195	A	T	1	2	0.333333	0.666667
gnl|UMD3.1|GK000010.2	719248	G	A	1	2	0.333333	0.666667
gnl|UMD3.1|GK000010.2	720349	C	A	2	2	0.5	0.5
gnl|UMD3.1|GK000010.2	721456	G	T	2	2	0.5	0.5
gnl|UMD3.1|GK000010.2	722186	C	T	0	2	0	1
gnl|UMD3.1|GK000010.2	723445	G	A	0	2	0	1
gnl|UMD3.1|GK000010.2	723810	A	G	0	2	0	1
gnl|UMD3.1|GK000010.2	725225	T	C	0	2	0	1
gnl|UMD3.1|GK000010.2	725341	G	A	0	2	0	1
gnl|UMD3.1|GK000010.2	725799	T	C	1	2	0.333333	0.666667
gnl|UMD3.1|GK000010.2	726343	G	C	1	4	0.2	0.8
gnl|UMD3.1|GK000010.2	726349	A	G	1	3	0.25	0.75
gnl|UMD3.1|GK000010.2	726415	T	C	0	4	0	1
gnl|UMD3.1|GK000010.2	729962	C	T	0	2	0	1
gnl|UMD3.1|GK000010.2	731431	A	G	0	2	0	1
gnl|UMD3.1|GK000010.2	731488	G	A	0	2	0	1
gnl|UMD3.1|GK000010.2	732631	C	T	2	2	0.5	0.5
gnl|UMD3.1|GK000010.2	734734	T	A	2	2	0.5	0.5
gnl|UMD3.1|GK000010.2	738464	A	G	0	2	0	1
gnl|UMD3.1|GK000010.2	738480	A	G	0	2	0	1
gnl|UMD3.1|GK000010.2	744930	A	G	0	2	0	1
gnl|UMD3.1|GK000010.2	744945	T	G	0	2	0	1
gnl|UMD3.1|GK000010.2	747922	A	G	3	2	0.6	0.4
gnl|UMD3.1|GK000010.2	747935	G	A	3	2	0.6	0.4
gnl|UMD3.1|GK000010.2	747954	C	T	3	2	0.6	0.4
gnl|UMD3.1|GK000010.2	747977	G	A	2	2	0.5	0.5
gnl|UMD3.1|GK000010.2	747993	T	G	1	2	0.333333	0.666667
gnl|UMD3.1|GK000010.2	748756	C	T	0	2	0	1
gnl|UMD3.1|GK000010.2	748765	G	C	0	2	0	1
gnl|UMD3.1|GK000010.2	749692	A	G	0	2	0	1
gnl|UMD3.1|GK000010.2	751608	C	A	0	2	0	1
gnl|UMD3.1|GK000010.2	763453	C	T	1	2	0.333333	0.666667
gnl|UMD3.1|GK000010.2	774599	A	G	0	2	0	1
gnl|UMD3.1|GK000010.2	774635	A	G	0	2	0	1
gnl|UMD3.1|GK000010.2	774692	C	T	0	2	0	1
gnl|UMD3.1|GK000010.2	784282	C	A	1	2	0.333333	0.666667
gnl|UMD3.1|GK000010.2	784373	C	T	0	2	0	1
gnl|UMD3.1|GK000010.2	798116	A	T	0	2	0	1
gnl|UMD3.1|GK000010.2	814302	A	T	1	2	0.333333	0.666667
gnl|UMD3.1|GK000010.2	820829	C	T	0	2	0	1
gnl|UMD3.1|GK000010.2	822311	A	C	0	2	0	1
gnl|UMD3.1|GK000010.2	853652	A	T	2	2	0.5	0.5
gnl|UMD3.1|GK000010.2	857757	G	T	1	2	0.333333	0.666667
gnl|UMD3.1|GK000010.2	868528	T	C	1	2	0.333333	0.666667
gnl|UMD3.1|GK000010.2	870862	A	T	0	2	0	1
gnl|UMD3.1|GK000010.2	880179	T	G	0	2	0	1
gnl|UMD3.1|GK000010.2	900027	G	T	5	2	0.714286	0.285714
gnl|UMD3.1|GK000010.2	911833	C	A	0	2	0	1
gnl|UMD3.1|GK000010.2	918687	C	T	1	2	0.333333	0.666667
gnl|UMD3.1|GK000010.2	921111	G	A	0	2	0	1
gnl|UMD3.1|GK000010.2	921749	T	C	0	4	0	1
gnl|UMD3.1|GK000010.2	921798	T	G	0	3	0	1
gnl|UMD3.1|GK000010.2	921858	T	C	1	2	0.333333	0.666667
gnl|UMD3.1|GK000010.2	921859	T	C	1	2	0.333333	0.666667
gnl|UMD3.1|GK000010.2	922163	T	A	4	3	0.571429	0.428571
gnl|UMD3.1|GK000010.2	922576	A	G	0	2	0	1
gnl|UMD3.1|GK000010.2	922599	A	G	0	2	0	1
gnl|UMD3.1|GK000010.2	922600	G	A	0	2	0	1
gnl|UMD3.1|GK000010.2	925534	A	T	1	2	0.333333	0.666667
gnl|UMD3.1|GK000010.2	928844	G	A	3	2	0.6	0.4
gnl|UMD3.1|GK000010.2	928906	A	C	1	3	0.25	0.75
gnl|UMD3.1|GK000010.2	930206	T	C	2	2	0.5	0.5
gnl|UMD3.1|GK000010.2	930223	T	C	2	2	0.5	0.5
gnl|UMD3.1|GK000010.2	930596	G	A	0	6	0	1
gnl|UMD3.1|GK000010.2	930776	T	C	6	3	0.666667	0.333333
gnl|UMD3.1|GK000010.2	930787	T	C	4	5	0.444444	0.555556
gnl|UMD3.1|GK000010.2	930801	T	C	4	3	0.571429	0.428571
gnl|UMD3.1|GK000010.2	930822	T	C	1	9	0.1	0.9
gnl|UMD3.1|GK000010.2	930836	T	C	8	2	0.8	0.2
gnl|UMD3.1|GK000010.2	930851	T	C	4	8	0.333333	0.666667
gnl|UMD3.1|GK000010.2	930853	T	C	5	6	0.454545	0.545455
gnl|UMD3.1|GK000010.2	931825	C	T	6	2	0.75	0.25
gnl|UMD3.1|GK000010.2	932298	C	A	3	6	0.333333	0.666667
gnl|UMD3.1|GK000010.2	932389	T	C	6	5	0.545455	0.454545
gnl|UMD3.1|GK000010.2	933079	T	A	6	2	0.75	0.25
gnl|UMD3.1|GK000010.2	934711	C	A	8	2	0.8	0.2
gnl|UMD3.1|GK000010.2	935297	C	A	12	13	0.48	0.52
gnl|UMD3.1|GK000010.2	935574	A	G	11	12	0.478261	0.521739
gnl|UMD3.1|GK000010.2	936537	A	T	2	5	0.285714	0.714286
gnl|UMD3.1|GK000010.2	938002	A	G	8	2	0.8	0.2
gnl|UMD3.1|GK000010.2	939620	G	A	6	3	0.666667	0.333333
gnl|UMD3.1|GK000010.2	939648	A	C	5	2	0.714286	0.285714
gnl|UMD3.1|GK000010.2	940572	A	C	6	5	0.545455	0.454545
gnl|UMD3.1|GK000010.2	940606	T	A	9	2	0.818182	0.181818
gnl|UMD3.1|GK000010.2	943186	N	G	0	7	0	1
gnl|UMD3.1|GK000010.2	943263	T	A	0	12	0	1
gnl|UMD3.1|GK000010.2	943425	G	A	0	3	0	1
gnl|UMD3.1|GK000010.2	943844	A	G	1	6	0.142857	0.857143
gnl|UMD3.1|GK000010.2	943993	G	T	7	4	0.636364	0.363636
gnl|UMD3.1|GK000010.2	944007	C	A	9	4	0.692308	0.307692
gnl|UMD3.1|GK000010.2	944399	C	G	4	8	0.333333	0.666667
gnl|UMD3.1|GK000010.2	948988	C	G	2	2	0.5	0.5
gnl|UMD3.1|GK000010.2	957996	T	C	0	2	0	1
gnl|UMD3.1|GK000010.2	966632	A	G	0	6	0	1
gnl|UMD3.1|GK000010.2	969832	G	A	0	2	0	1
gnl|UMD3.1|GK000010.2	972895	C	T	0	2	0	1
gnl|UMD3.1|GK000010.2	975501	A	G	0	2	0	1
gnl|UMD3.1|GK000010.2	976872	A	G	2	2	0.5	0.5
gnl|UMD3.1|GK000010.2	988904	T	A	0	2	0	1
gnl|UMD3.1|GK000010.2	990701	T	G	0	2	0	1
gnl|UMD3.1|GK000010.2	991558	T	A	1	1	0.5	0.5
gnl|UMD3.1|GK000010.2	992511	A	G	1	4	0.2	0.8
gnl|UMD3.1|GK000010.2	1045007	A	G	0	2	0	1
gnl|UMD3.1|GK000010.2	1072760	T	A	0	2	0	1
gnl|UMD3.1|GK000010.2	1072761	A	T	0	2	0	1
gnl|UMD3.1|GK000010.2	1074126	G	C	0	2	0	1
gnl|UMD3.1|GK000010.2	1074143	C	A	0	1	0	1
gnl|UMD3.1|GK000010.2	1075072	T	G	0	2	0	1
gnl|UMD3.1|GK000010.2	1079202	A	G	1	2	0.333333	0.666667
gnl|UMD3.1|GK000010.2	1086765	C	T	1	2	0.333333	0.666667
gnl|UMD3.1|GK000010.2	1089497	T	C	15	22	0.405405	0.594595
gnl|UMD3.1|GK000010.2	1089555	G	A	15	19	0.441176	0.558824
gnl|UMD3.1|GK000010.2	1089581	T	C	12	15	0.444444	0.555556
gnl|UMD3.1|GK000010.2	1092336	T	G	36	33	0.521739	0.478261
gnl|UMD3.1|GK000010.2	1093739	A	G	1	156	0.00636943	0.993631
gnl|UMD3.1|GK000010.2	1093835	A	C	2	144	0.0136986	0.986301
gnl|UMD3.1|GK000010.2	1093876	C	T	1	184	0.00540541	0.994595
gnl|UMD3.1|GK000010.2	1096241	A	G	0	2	0	1
gnl|UMD3.1|GK000010.2	1097624	T	C	0	5	0	1
gnl|UMD3.1|GK000010.2	1097631	T	C	0	5	0	1
gnl|UMD3.1|GK000010.2	1097637	T	C	0	5	0	1
gnl|UMD3.1|GK000010.2	1104139	C	A	6	2	0.75	0.25
gnl|UMD3.1|GK000010.2	1104675	G	A	12	2	0.857143	0.142857
gnl|UMD3.1|GK000010.2	1104953	A	C	8	12	0.4	0.6
gnl|UMD3.1|GK000010.2	1107034	T	C	0	3	0	1
gnl|UMD3.1|GK000010.2	1108607	G	A	2	2	0.5	0.5
gnl|UMD3.1|GK000010.2	1113012	G	A	3	2	0.6	0.4
gnl|UMD3.1|GK000010.2	1117245	G	A	10	2	0.833333	0.166667
gnl|UMD3.1|GK000010.2	1122573	C	T	0	16	0	1
gnl|UMD3.1|GK000010.2	1126617	A	G	0	2	0	1
gnl|UMD3.1|GK000010.2	1143067	G	A	0	3	0	1
gnl|UMD3.1|GK000010.2	1147940	A	G	0	2	0	1
gnl|UMD3.1|GK000010.2	1149051	C	A	1	2	0.333333	0.666667
gnl|UMD3.1|GK000010.2	1161469	G	T	0	2	0	1
gnl|UMD3.1|GK000010.2	1162989	T	C	4	2	0.666667	0.333333
gnl|UMD3.1|GK000010.2	1191423	A	C	5	2	0.714286	0.285714
gnl|UMD3.1|GK000010.2	1201837	A	T	3	2	0.6	0.4
gnl|UMD3.1|GK000010.2	1205401	C	A	1	2	0.333333	0.666667
gnl|UMD3.1|GK000010.2	1227030	T	A	0	2	0	1
gnl|UMD3.1|GK000010.2	1228753	C	A	5	3	0.625	0.375
gnl|UMD3.1|GK000010.2	1228779	C	A	3	2	0.6	0.4
gnl|UMD3.1|GK000010.2	1228820	A	T	0	4	0	1
gnl|UMD3.1|GK000010.2	1228823	A	C	0	3	0	1
gnl|UMD3.1|GK000010.2	1230316	C	A	2	2	0.5	0.5
gnl|UMD3.1|GK000010.2	1230318	C	A	1	2	0.333333	0.666667
gnl|UMD3.1|GK000010.2	1230359	C	A	2	3	0.4	0.6
gnl|UMD3.1|GK000010.2	1230522	T	C	3	2	0.6	0.4
gnl|UMD3.1|GK000010.2	1230561	T	C	2	2	0.5	0.5
gnl|UMD3.1|GK000010.2	1231238	T	C	1	2	0.333333	0.666667
gnl|UMD3.1|GK000010.2	1231313	T	C	1	2	0.333333	0.666667
gnl|UMD3.1|GK000010.2	1231689	A	T	3	2	0.6	0.4
gnl|UMD3.1|GK000010.2	1232557	T	C	2	2	0.5	0.5
gnl|UMD3.1|GK000010.2	1232568	T	C	0	4	0	1
gnl|UMD3.1|GK000010.2	1232630	T	C	3	2	0.6	0.4
gnl|UMD3.1|GK000010.2	1232740	G	T	4	2	0.666667	0.333333
gnl|UMD3.1|GK000010.2	1237014	T	C	2	3	0.4	0.6
gnl|UMD3.1|GK000010.2	1241382	T	C	3	2	0.6	0.4
gnl|UMD3.1|GK000010.2	1242071	T	C	1	2	0.333333	0.666667
gnl|UMD3.1|GK000010.2	1250199	T	C	1	2	0.333333	0.666667
gnl|UMD3.1|GK000010.2	1250204	T	C	1	2	0.333333	0.666667
gnl|UMD3.1|GK000010.2	1250216	T	C	1	2	0.333333	0.666667
gnl|UMD3.1|GK000010.2	1394478	C	G	0	2	0	1
gnl|UMD3.1|GK000010.2	1397243	T	C	0	2	0	1
gnl|UMD3.1|GK000010.2	1397268	T	C	0	2	0	1
gnl|UMD3.1|GK000010.2	1397275	T	C	0	2	0	1
gnl|UMD3.1|GK000010.2	1431160	T	A	1	2	0.333333	0.666667
gnl|UMD3.1|GK000010.2	1467518	C	T	1	4	0.2	0.8
gnl|UMD3.1|GK000010.2	1468253	T	C	6	2	0.75	0.25
gnl|UMD3.1|GK000010.2	1468258	T	C	0	7	0	1
gnl|UMD3.1|GK000010.2	1468329	G	T	7	2	0.777778	0.222222
gnl|UMD3.1|GK000010.2	1469241	C	G	0	4	0	1
gnl|UMD3.1|GK000010.2	1469960	T	A	0	2	0	1
gnl|UMD3.1|GK000010.2	1471338	G	A	0	2	0	1
gnl|UMD3.1|GK000010.2	1471807	T	G	0	2	0	1
gnl|UMD3.1|GK000010.2	1472077	G	T	0	1	0	1
gnl|UMD3.1|GK000010.2	1473051	T	C	0	2	0	1
gnl|UMD3.1|GK000010.2	1473676	T	C	0	3	0	1
gnl|UMD3.1|GK000010.2	1475553	G	A	0	2	0	1
gnl|UMD3.1|GK000010.2	1475609	G	A	0	5	0	1
gnl|UMD3.1|GK000010.2	1475628	G	A	0	5	0	1
gnl|UMD3.1|GK000010.2	1476043	G	A	1	2	0.333333	0.666667
gnl|UMD3.1|GK000010.2	1476136	T	C	0	6	0	1
gnl|UMD3.1|GK000010.2	1476714	T	C	0	9	0	1
gnl|UMD3.1|GK000010.2	1476954	C	G	0	2	0	1
gnl|UMD3.1|GK000010.2	1477977	A	G	2	2	0.5	0.5
gnl|UMD3.1|GK000010.2	1478619	A	T	0	2	0	1
gnl|UMD3.1|GK000010.2	1478850	G	C	0	5	0	1
gnl|UMD3.1|GK000010.2	1479316	T	C	0	2	0	1
gnl|UMD3.1|GK000010.2	1482345	C	A	0	2	0	1
gnl|UMD3.1|GK000010.2	1482742	A	C	0	2	0	1
gnl|UMD3.1|GK000010.2	1483668	C	T	0	2	0	1
gnl|UMD3.1|GK000010.2	1485216	G	A	0	2	0	1
gnl|UMD3.1|GK000010.2	1485313	G	C	0	3	0	1
gnl|UMD3.1|GK000010.2	1487387	T	A	2	2	0.5	0.5
gnl|UMD3.1|GK000010.2	1487449	T	A	1	2	0.333333	0.666667
gnl|UMD3.1|GK000010.2	1487463	T	C	1	1	0.5	0.5
gnl|UMD3.1|GK000010.2	1488371	T	C	0	2	0	1
gnl|UMD3.1|GK000010.2	1488998	T	C	0	2	0	1
gnl|UMD3.1|GK000010.2	1489180	C	T	0	3	0	1
gnl|UMD3.1|GK000010.2	1492252	G	A	0	3	0	1
gnl|UMD3.1|GK000010.2	1492276	T	G	0	4	0	1
gnl|UMD3.1|GK000010.2	1492342	C	A	1	3	0.25	0.75
gnl|UMD3.1|GK000010.2	1493278	C	G	0	2	0	1
gnl|UMD3.1|GK000010.2	1494070	T	A	0	2	0	1
gnl|UMD3.1|GK000010.2	1494137	G	T	0	2	0	1
gnl|UMD3.1|GK000010.2	1494153	G	T	0	2	0	1
gnl|UMD3.1|GK000010.2	1500756	G	A	0	3	0	1
gnl|UMD3.1|GK000010.2	1504129	G	A	0	2	0	1
gnl|UMD3.1|GK000010.2	1504379	G	A	1	2	0.333333	0.666667
gnl|UMD3.1|GK000010.2	1511283	T	G	0	2	0	1
gnl|UMD3.1|GK000010.2	1519285	A	G	0	2	0	1
gnl|UMD3.1|GK000010.2	1523398	T	G	0	2	0	1
gnl|UMD3.1|GK000010.2	1523695	T	C	0	2	0	1
gnl|UMD3.1|GK000010.2	1523705	G	A	0	2	0	1
gnl|UMD3.1|GK000010.2	1524039	A	G	0	4	0	1
gnl|UMD3.1|GK000010.2	1524103	T	C	0	2	0	1
gnl|UMD3.1|GK000010.2	1527750	C	T	0	2	0	1
gnl|UMD3.1|GK000010.2	1527859	T	A	0	3	0	1
gnl|UMD3.1|GK000010.2	1532701	G	C	1	2	0.333333	0.666667
gnl|UMD3.1|GK000010.2	1540647	A	G	1	2	0.333333	0.666667
gnl|UMD3.1|GK000010.2	1542666	A	G	0	2	0	1
gnl|UMD3.1|GK000010.2	1544199	A	G	1	2	0.333333	0.666667
gnl|UMD3.1|GK000010.2	1546090	A	G	0	1	0	1
gnl|UMD3.1|GK000010.2	1549046	C	T	0	2	0	1
gnl|UMD3.1|GK000010.2	1550064	G	T	0	2	0	1
gnl|UMD3.1|GK000010.2	1552461	G	A	0	2	0	1
gnl|UMD3.1|GK000010.2	1558237	G	A	0	2	0	1
gnl|UMD3.1|GK000010.2	1561102	A	G	0	2	0	1
gnl|UMD3.1|GK000010.2	1561108	C	T	1	2	0.333333	0.666667
gnl|UMD3.1|GK000010.2	1561957	A	G	0	2	0	1
gnl|UMD3.1|GK000010.2	1566296	A	G	0	2	0	1
gnl|UMD3.1|GK000010.2	1569446	C	T	0	2	0	1
gnl|UMD3.1|GK000010.2	1573725	T	C	0	5	0	1
gnl|UMD3.1|GK000010.2	1573751	G	A	0	4	0	1
gnl|UMD3.1|GK000010.2	1577409	C	G	0	2	0	1
gnl|UMD3.1|GK000010.2	1579969	C	T	0	3	0	1
gnl|UMD3.1|GK000010.2	1591436	A	G	0	2	0	1
gnl|UMD3.1|GK000010.2	1593957	T	C	0	3	0	1
gnl|UMD3.1|GK000010.2	1605094	A	G	0	2	0	1
gnl|UMD3.1|GK000010.2	1607972	G	A	0	1	0	1
gnl|UMD3.1|GK000010.2	1608228	T	C	0	2	0	1
gnl|UMD3.1|GK000010.2	1613239	T	C	0	3	0	1
gnl|UMD3.1|GK000010.2	1617799	T	C	0	2	0	1
gnl|UMD3.1|GK000010.2	1617945	A	T	0	3	0	1
gnl|UMD3.1|GK000010.2	1625351	T	A	0	2	0	1
gnl|UMD3.1|GK000010.2	1628046	C	T	0	2	0	1
gnl|UMD3.1|GK000010.2	1630442	A	G	0	2	0	1
gnl|UMD3.1|GK000010.2	1633993	T	C	0	3	0	1
gnl|UMD3.1|GK000010.2	1634050	A	G	1	6	0.142857	0.857143
gnl|UMD3.1|GK000010.2	1641902	G	A	0	2	0	1
gnl|UMD3.1|GK000010.2	1652997	G	T	0	2	0	1
gnl|UMD3.1|GK000010.2	1660051	G	A	0	2	0	1
gnl|UMD3.1|GK000010.2	1661527	T	G	0	2	0	1
gnl|UMD3.1|GK000010.2	1666320	G	C	0	2	0	1
gnl|UMD3.1|GK000010.2	1668659	G	A	0	2	0	1
gnl|UMD3.1|GK000010.2	1668956	C	G	0	2	0	1
gnl|UMD3.1|GK000010.2	1669800	C	T	0	4	0	1
gnl|UMD3.1|GK000010.2	1674884	A	T	1	1	0.5	0.5
gnl|UMD3.1|GK000010.2	1677073	A	G	2	2	0.5	0.5
gnl|UMD3.1|GK000010.2	1687779	A	G	0	4	0	1
gnl|UMD3.1|GK000010.2	1687782	A	G	0	4	0	1
gnl|UMD3.1|GK000010.2	1687803	A	G	0	4	0	1
gnl|UMD3.1|GK000010.2	1690582	T	G	3	3	0.5	0.5
gnl|UMD3.1|GK000010.2	1690586	T	G	4	2	0.666667	0.333333
gnl|UMD3.1|GK000010.2	1692355	C	T	0	2	0	1
gnl|UMD3.1|GK000010.2	1694776	G	C	0	3	0	1
gnl|UMD3.1|GK000010.2	1697090	A	G	0	2	0	1
gnl|UMD3.1|GK000010.2	1700887	T	C	0	2	0	1
gnl|UMD3.1|GK000010.2	1704292	C	T	0	2	0	1
gnl|UMD3.1|GK000010.2	1707154	T	C	0	2	0	1
gnl|UMD3.1|GK000010.2	1709945	A	G	0	3	0	1
gnl|UMD3.1|GK000010.2	1710313	C	T	2	2	0.5	0.5
gnl|UMD3.1|GK000010.2	1715416	G	C	0	3	0	1
gnl|UMD3.1|GK000010.2	1716385	T	C	0	6	0	1
gnl|UMD3.1|GK000010.2	1716681	A	T	0	13	0	1
gnl|UMD3.1|GK000010.2	1717908	T	C	0	6	0	1
gnl|UMD3.1|GK000010.2	1718135	C	T	0	11	0	1
gnl|UMD3.1|GK000010.2	1720676	C	T	0	3	0	1
gnl|UMD3.1|GK000010.2	1721088	G	A	0	1	0	1
gnl|UMD3.1|GK000010.2	1724532	T	A	0	4	0	1
gnl|UMD3.1|GK000010.2	1725461	G	A	0	10	0	1
gnl|UMD3.1|GK000010.2	1725477	G	T	10	2	0.833333	0.166667
gnl|UMD3.1|GK000010.2	1726143	T	C	0	2	0	1
gnl|UMD3.1|GK000010.2	1726866	G	A	0	3	0	1
gnl|UMD3.1|GK000010.2	1726868	G	A	0	3	0	1
gnl|UMD3.1|GK000010.2	1727242	G	A	1	3	0.25	0.75
gnl|UMD3.1|GK000010.2	1727282	G	T	1	1	0.5	0.5
gnl|UMD3.1|GK000010.2	1727988	A	G	0	9	0	1
gnl|UMD3.1|GK000010.2	1728646	C	T	0	3	0	1
gnl|UMD3.1|GK000010.2	1729208	G	A	1	4	0.2	0.8
gnl|UMD3.1|GK000010.2	1729452	C	A	0	4	0	1
gnl|UMD3.1|GK000010.2	1732522	T	C	0	2	0	1
gnl|UMD3.1|GK000010.2	1733622	A	T	0	2	0	1
gnl|UMD3.1|GK000010.2	1735934	G	A	0	2	0	1
gnl|UMD3.1|GK000010.2	1742137	A	G	6	2	0.75	0.25
gnl|UMD3.1|GK000010.2	1744960	A	G	0	2	0	1
gnl|UMD3.1|GK000010.2	1746139	C	T	0	2	0	1
gnl|UMD3.1|GK000010.2	1753946	A	G	0	2	0	1
gnl|UMD3.1|GK000010.2	1759697	G	T	2	2	0.5	0.5
gnl|UMD3.1|GK000010.2	1760895	G	A	2	2	0.5	0.5
gnl|UMD3.1|GK000010.2	1761001	C	T	0	16	0	1
gnl|UMD3.1|GK000010.2	1761240	T	G	0	9	0	1
gnl|UMD3.1|GK000010.2	1763999	C	T	37	52	0.41573	0.58427
gnl|UMD3.1|GK000010.2	1764298	A	T	5	6	0.454545	0.545455
gnl|UMD3.1|GK000010.2	1790217	T	C	0	2	0	1
gnl|UMD3.1|GK000010.2	1994061	A	G	0	2	0	1
gnl|UMD3.1|GK000010.2	2067827	C	T	0	2	0	1
gnl|UMD3.1|GK000010.2	2067848	A	G	0	9	0	1
gnl|UMD3.1|GK000010.2	2067863	A	C	0	13	0	1
gnl|UMD3.1|GK000010.2	2067889	C	T	0	16	0	1
gnl|UMD3.1|GK000010.2	2067897	C	A	0	15	0	1
gnl|UMD3.1|GK000010.2	2067911	C	T	0	19	0	1
gnl|UMD3.1|GK000010.2	2067926	T	C	0	20	0	1
gnl|UMD3.1|GK000010.2	2067962	A	G	0	27	0	1
gnl|UMD3.1|GK000010.2	2067974	T	C	0	26	0	1
gnl|UMD3.1|GK000010.2	2068004	A	G	0	18	0	1
gnl|UMD3.1|GK000010.2	2068034	T	C	0	17	0	1
gnl|UMD3.1|GK000010.2	2068035	A	T	0	17	0	1
gnl|UMD3.1|GK000010.2	2068064	G	A	0	21	0	1
gnl|UMD3.1|GK000010.2	2068067	C	G	0	21	0	1
gnl|UMD3.1|GK000010.2	2068084	G	T	0	23	0	1
gnl|UMD3.1|GK000010.2	2068085	A	G	0	22	0	1
gnl|UMD3.1|GK000010.2	2068111	G	C	0	18	0	1
gnl|UMD3.1|GK000010.2	2068114	A	T	0	19	0	1
gnl|UMD3.1|GK000010.2	2068137	C	T	0	16	0	1
gnl|UMD3.1|GK000010.2	2068166	G	T	0	12	0	1
gnl|UMD3.1|GK000010.2	2068169	C	T	0	9	0	1
gnl|UMD3.1|GK000010.2	2068174	A	G	0	9	0	1
gnl|UMD3.1|GK000010.2	2068181	C	T	0	4	0	1
gnl|UMD3.1|GK000010.2	2068200	G	T	0	7	0	1
gnl|UMD3.1|GK000010.2	2068204	C	G	0	3	0	1
gnl|UMD3.1|GK000010.2	2068229	C	A	0	4	0	1
gnl|UMD3.1|GK000010.2	2068247	T	C	0	5	0	1
gnl|UMD3.1|GK000010.2	2068275	A	G	0	6	0	1
gnl|UMD3.1|GK000010.2	2068282	T	C	0	7	0	1
gnl|UMD3.1|GK000010.2	2068290	C	T	0	7	0	1
gnl|UMD3.1|GK000010.2	2068293	G	T	0	7	0	1
gnl|UMD3.1|GK000010.2	2068299	A	G	0	6	0	1
gnl|UMD3.1|GK000010.2	2068320	T	C	0	9	0	1
gnl|UMD3.1|GK000010.2	2068325	T	A	0	9	0	1
gnl|UMD3.1|GK000010.2	2068326	G	A	0	9	0	1
gnl|UMD3.1|GK000010.2	2068330	C	T	0	7	0	1
gnl|UMD3.1|GK000010.2	2068352	A	C	0	11	0	1
gnl|UMD3.1|GK000010.2	2068411	T	C	0	6	0	1
gnl|UMD3.1|GK000010.2	2068412	G	T	0	6	0	1
gnl|UMD3.1|GK000010.2	2068421	T	C	0	6	0	1
gnl|UMD3.1|GK000010.2	2068430	C	A	0	6	0	1
gnl|UMD3.1|GK000010.2	2068431	G	A	0	6	0	1
gnl|UMD3.1|GK000010.2	2068454	G	A	0	10	0	1
gnl|UMD3.1|GK000010.2	2068462	G	T	0	10	0	1
gnl|UMD3.1|GK000010.2	2068464	C	A	0	9	0	1
gnl|UMD3.1|GK000010.2	2068534	G	T	0	4	0	1
gnl|UMD3.1|GK000010.2	2068552	T	C	0	4	0	1
gnl|UMD3.1|GK000010.2	2068554	G	A	0	3	0	1
gnl|UMD3.1|GK000010.2	2068571	G	A	0	2	0	1
gnl|UMD3.1|GK000010.2	2077396	G	T	0	2	0	1
gnl|UMD3.1|GK000010.2	2163995	G	C	2	2	0.5	0.5
gnl|UMD3.1|GK000010.2	2184576	T	G	1	2	0.333333	0.666667
gnl|UMD3.1|GK000010.2	2189975	T	A	0	2	0	1
gnl|UMD3.1|GK000010.2	2190308	T	A	1	2	0.333333	0.666667
gnl|UMD3.1|GK000010.2	2198622	C	A	0	2	0	1
gnl|UMD3.1|GK000010.2	2214117	T	C	0	2	0	1
gnl|UMD3.1|GK000010.2	2214497	A	T	0	2	0	1
gnl|UMD3.1|GK000010.2	2361869	A	C	5	2	0.714286	0.285714
gnl|UMD3.1|GK000010.2	2361923	T	G	4	2	0.666667	0.333333
gnl|UMD3.1|GK000010.2	2362632	C	A	1	2	0.333333	0.666667
gnl|UMD3.1|GK000010.2	2363741	C	A	1	2	0.333333	0.666667
gnl|UMD3.1|GK000010.2	2365600	A	G	0	2	0	1
gnl|UMD3.1|GK000010.2	2365604	A	G	0	2	0	1
gnl|UMD3.1|GK000010.2	2365611	A	G	0	2	0	1
gnl|UMD3.1|GK000010.2	2366282	A	G	1	2	0.333333	0.666667
gnl|UMD3.1|GK000010.2	2366567	A	G	0	2	0	1
gnl|UMD3.1|GK000010.2	2366572	A	G	0	3	0	1
gnl|UMD3.1|GK000010.2	2366588	A	G	1	2	0.333333	0.666667
gnl|UMD3.1|GK000010.2	2369724	A	T	0	1	0	1
gnl|UMD3.1|GK000010.2	2369728	C	T	0	1	0	1
gnl|UMD3.1|GK000010.2	2369734	A	T	0	3	0	1
gnl|UMD3.1|GK000010.2	2370436	A	T	5	2	0.714286	0.285714
gnl|UMD3.1|GK000010.2	2376105	A	T	0	3	0	1
gnl|UMD3.1|GK000010.2	2394852	G	A	3	3	0.5	0.5
gnl|UMD3.1|GK000010.2	2396539	A	T	0	2	0	1
gnl|UMD3.1|GK000010.2	2397633	A	G	0	2	0	1
gnl|UMD3.1|GK000010.2	2399156	G	A	0	3	0	1
gnl|UMD3.1|GK000010.2	2403005	C	T	4	2	0.666667	0.333333
gnl|UMD3.1|GK000010.2	2405247	C	A	7	2	0.777778	0.222222
gnl|UMD3.1|GK000010.2	2411261	T	C	0	2	0	1
gnl|UMD3.1|GK000010.2	2414237	C	T	8	2	0.8	0.2
gnl|UMD3.1|GK000010.2	2427246	C	T	0	2	0	1
gnl|UMD3.1|GK000010.2	2429608	A	G	0	2	0	1
gnl|UMD3.1|GK000010.2	2429625	A	G	0	2	0	1
gnl|UMD3.1|GK000010.2	2429627	A	G	0	2	0	1
gnl|UMD3.1|GK000010.2	2430556	G	A	0	4	0	1
gnl|UMD3.1|GK000010.2	2430960	C	G	0	2	0	1
gnl|UMD3.1|GK000010.2	2431016	A	G	1	2	0.333333	0.666667
gnl|UMD3.1|GK000010.2	2431043	A	G	1	2	0.333333	0.666667
gnl|UMD3.1|GK000010.2	2432634	G	A	0	2	0	1
gnl|UMD3.1|GK000010.2	2434172	A	G	15	14	0.517241	0.482759
gnl|UMD3.1|GK000010.2	2434362	T	C	0	22	0	1
gnl|UMD3.1|GK000010.2	2434407	G	T	20	8	0.714286	0.285714
gnl|UMD3.1|GK000010.2	2434455	G	A	21	6	0.777778	0.222222
gnl|UMD3.1|GK000010.2	2434503	C	T	17	12	0.586207	0.413793
gnl|UMD3.1|GK000010.2	2437245	T	A	0	2	0	1
gnl|UMD3.1|GK000010.2	2879389	A	G	0	2	0	1
gnl|UMD3.1|GK000010.2	2879418	T	A	0	2	0	1
gnl|UMD3.1|GK000010.2	2879628	T	G	0	2	0	1
gnl|UMD3.1|GK000010.2	2879633	G	C	0	2	0	1
gnl|UMD3.1|GK000010.2	2880502	G	T	0	1	0	1
gnl|UMD3.1|GK000010.2	2882706	C	T	0	2	0	1
gnl|UMD3.1|GK000010.2	2896828	C	T	0	2	0	1
gnl|UMD3.1|GK000010.2	2911118	A	G	0	3	0	1
gnl|UMD3.1|GK000010.2	2911119	A	G	0	3	0	1
gnl|UMD3.1|GK000010.2	2913613	G	T	0	2	0	1
gnl|UMD3.1|GK000010.2	2954148	T	C	0	2	0	1
gnl|UMD3.1|GK000010.2	2958714	A	G	0	2	0	1
gnl|UMD3.1|GK000010.2	2958715	A	G	0	2	0	1
gnl|UMD3.1|GK000010.2	2958727	A	G	0	2	0	1
gnl|UMD3.1|GK000010.2	2958732	A	G	0	2	0	1
gnl|UMD3.1|GK000010.2	2958749	A	G	0	2	0	1
gnl|UMD3.1|GK000010.2	2958760	A	G	0	2	0	1
gnl|UMD3.1|GK000010.2	2958782	A	G	0	2	0	1
gnl|UMD3.1|GK000010.2	2958787	A	G	0	2	0	1
gnl|UMD3.1|GK000010.2	2959390	A	G	0	2	0	1
gnl|UMD3.1|GK000010.2	2963115	G	A	0	4	0	1
gnl|UMD3.1|GK000010.2	2963156	A	C	0	4	0	1
gnl|UMD3.1|GK000010.2	2965079	T	C	0	2	0	1
gnl|UMD3.1|GK000010.2	2965108	G	T	0	2	0	1
gnl|UMD3.1|GK000010.2	2975493	G	A	0	2	0	1
gnl|UMD3.1|GK000010.2	2979047	C	T	0	2	0	1
gnl|UMD3.1|GK000010.2	3028674	T	A	0	2	0	1
gnl|UMD3.1|GK000010.2	3048761	G	A	8	3	0.727273	0.272727
gnl|UMD3.1|GK000010.2	3048767	G	A	8	3	0.727273	0.272727
gnl|UMD3.1|GK000010.2	3067668	G	A	0	2	0	1
gnl|UMD3.1|GK000010.2	3068609	A	G	0	2	0	1
gnl|UMD3.1|GK000010.2	3072239	G	T	0	2	0	1
gnl|UMD3.1|GK000010.2	3072312	C	T	0	4	0	1
gnl|UMD3.1|GK000010.2	3080296	C	T	0	2	0	1
gnl|UMD3.1|GK000010.2	3083616	C	T	0	2	0	1
gnl|UMD3.1|GK000010.2	3085289	A	G	0	2	0	1
gnl|UMD3.1|GK000010.2	3085333	A	G	1	2	0.333333	0.666667
gnl|UMD3.1|GK000010.2	3091572	G	T	0	2	0	1
gnl|UMD3.1|GK000010.2	3130644	A	G	0	2	0	1
gnl|UMD3.1|GK000010.2	3130645	A	G	0	2	0	1
gnl|UMD3.1|GK000010.2	3132591	C	A	0	2	0	1
gnl|UMD3.1|GK000010.2	3150232	T	A	0	2	0	1
gnl|UMD3.1|GK000010.2	3150313	C	T	0	2	0	1
gnl|UMD3.1|GK000010.2	3150324	T	A	0	2	0	1
gnl|UMD3.1|GK000010.2	3150330	T	A	0	2	0	1
gnl|UMD3.1|GK000010.2	3150331	C	T	0	2	0	1
gnl|UMD3.1|GK000010.2	3150813	A	G	0	2	0	1
gnl|UMD3.1|GK000010.2	3150888	A	G	0	2	0	1
gnl|UMD3.1|GK000010.2	3206537	A	G	3	2	0.6	0.4
gnl|UMD3.1|GK000010.2	3207270	C	A	0	2	0	1
gnl|UMD3.1|GK000010.2	3207295	A	C	0	2	0	1
gnl|UMD3.1|GK000010.2	3237964	A	C	0	2	0	1
gnl|UMD3.1|GK000010.2	3237975	T	C	0	2	0	1
gnl|UMD3.1|GK000010.2	3238009	A	G	1	2	0.333333	0.666667
gnl|UMD3.1|GK000010.2	3240237	C	A	0	2	0	1
gnl|UMD3.1|GK000010.2	3246878	T	C	0	4	0	1
gnl|UMD3.1|GK000010.2	3246967	T	C	0	2	0	1
gnl|UMD3.1|GK000010.2	3246971	A	G	0	2	0	1
gnl|UMD3.1|GK000010.2	3249557	G	T	3	2	0.6	0.4
gnl|UMD3.1|GK000010.2	3261221	T	C	0	2	0	1
gnl|UMD3.1|GK000010.2	3265238	T	C	0	3	0	1
gnl|UMD3.1|GK000010.2	3265268	C	T	0	3	0	1
gnl|UMD3.1|GK000010.2	3265332	T	C	0	2	0	1
gnl|UMD3.1|GK000010.2	3265635	C	T	4	2	0.666667	0.333333
gnl|UMD3.1|GK000010.2	3265708	A	G	1	2	0.333333	0.666667
gnl|UMD3.1|GK000010.2	3269569	T	C	0	4	0	1
gnl|UMD3.1|GK000010.2	3296745	A	G	0	2	0	1
gnl|UMD3.1|GK000010.2	3300218	G	A	0	3	0	1
gnl|UMD3.1|GK000010.2	3300232	A	G	1	2	0.333333	0.666667
gnl|UMD3.1|GK000010.2	3315418	C	G	0	3	0	1
gnl|UMD3.1|GK000010.2	3328179	G	A	0	2	0	1
gnl|UMD3.1|GK000010.2	3358366	A	G	1	2	0.333333	0.666667
gnl|UMD3.1|GK000010.2	3364406	C	G	0	2	0	1
gnl|UMD3.1|GK000010.2	3369367	G	T	4	2	0.666667	0.333333
gnl|UMD3.1|GK000010.2	3440446	C	T	7	2	0.777778	0.222222
gnl|UMD3.1|GK000010.2	3586052	G	A	0	4	0	1
gnl|UMD3.1|GK000010.2	3586134	T	C	0	13	0	1
gnl|UMD3.1|GK000010.2	3586152	T	C	0	15	0	1
gnl|UMD3.1|GK000010.2	3586250	A	G	0	17	0	1
gnl|UMD3.1|GK000010.2	3586449	G	A	0	7	0	1
gnl|UMD3.1|GK000010.2	3663952	A	G	0	2	0	1
gnl|UMD3.1|GK000010.2	3916882	G	A	0	2	0	1
gnl|UMD3.1|GK000010.2	3928268	A	G	0	2	0	1
gnl|UMD3.1|GK000010.2	3996007	C	T	0	10	0	1
gnl|UMD3.1|GK000010.2	3996154	C	T	3	4	0.428571	0.571429
gnl|UMD3.1|GK000010.2	3997080	C	G	2	2	0.5	0.5
gnl|UMD3.1|GK000010.2	3997159	C	T	5	7	0.416667	0.583333
gnl|UMD3.1|GK000010.2	3997204	C	T	4	9	0.307692	0.692308
gnl|UMD3.1|GK000010.2	4002536	T	A	0	7	0	1
gnl|UMD3.1|GK000010.2	4002540	G	A	0	7	0	1
gnl|UMD3.1|GK000010.2	4002544	G	A	0	7	0	1
gnl|UMD3.1|GK000010.2	4002553	G	A	0	7	0	1
gnl|UMD3.1|GK000010.2	4002594	T	A	0	3	0	1
gnl|UMD3.1|GK000010.2	4002598	T	A	0	3	0	1
gnl|UMD3.1|GK000010.2	4002629	C	T	0	2	0	1
gnl|UMD3.1|GK000010.2	4004872	C	A	1	1	0.5	0.5
gnl|UMD3.1|GK000010.2	4024232	G	A	1	2	0.333333	0.666667
gnl|UMD3.1|GK000010.2	4027689	G	T	3	2	0.6	0.4
gnl|UMD3.1|GK000010.2	4028896	T	C	6	2	0.75	0.25
gnl|UMD3.1|GK000010.2	4029301	G	A	5	2	0.714286	0.285714
gnl|UMD3.1|GK000010.2	4030603	C	A	0	2	0	1
gnl|UMD3.1|GK000010.2	4030891	T	C	3	2	0.6	0.4
gnl|UMD3.1|GK000010.2	4032511	C	T	2	2	0.5	0.5
gnl|UMD3.1|GK000010.2	4033648	T	C	0	2	0	1
gnl|UMD3.1|GK000010.2	4036798	A	T	1	1	0.5	0.5
gnl|UMD3.1|GK000010.2	4045251	A	G	0	2	0	1
gnl|UMD3.1|GK000010.2	4049374	T	G	0	2	0	1
gnl|UMD3.1|GK000010.2	4056122	C	T	0	18	0	1
gnl|UMD3.1|GK000010.2	4056123	T	C	0	21	0	1
gnl|UMD3.1|GK000010.2	4066349	G	A	1	2	0.333333	0.666667
gnl|UMD3.1|GK000010.2	4067273	T	A	0	3	0	1
gnl|UMD3.1|GK000010.2	4067274	G	A	0	3	0	1
gnl|UMD3.1|GK000010.2	4068940	T	C	0	2	0	1
gnl|UMD3.1|GK000010.2	4075736	T	C	1	2	0.333333	0.666667
gnl|UMD3.1|GK000010.2	4075738	T	C	1	2	0.333333	0.666667
gnl|UMD3.1|GK000010.2	4075783	T	C	1	2	0.333333	0.666667
gnl|UMD3.1|GK000010.2	4080030	T	A	2	2	0.5	0.5
gnl|UMD3.1|GK000010.2	4085419	T	G	4	2	0.666667	0.333333
gnl|UMD3.1|GK000010.2	4085537	A	G	0	2	0	1
gnl|UMD3.1|GK000010.2	4197357	C	T	0	2	0	1
gnl|UMD3.1|GK000010.2	4197383	C	T	0	2	0	1
gnl|UMD3.1|GK000010.2	4197441	C	A	0	2	0	1
gnl|UMD3.1|GK000010.2	4197458	C	T	0	2	0	1
gnl|UMD3.1|GK000010.2	4197593	A	G	0	2	0	1
gnl|UMD3.1|GK000010.2	4302998	G	A	0	2	0	1
gnl|UMD3.1|GK000010.2	4304550	G	A	5	2	0.714286	0.285714
gnl|UMD3.1|GK000010.2	4311958	A	G	0	5	0	1
gnl|UMD3.1|GK000010.2	4311966	C	T	0	3	0	1
gnl|UMD3.1|GK000010.2	4312338	C	G	1	2	0.333333	0.666667
gnl|UMD3.1|GK000010.2	4312346	C	T	0	3	0	1
gnl|UMD3.1|GK000010.2	4323943	T	C	0	2	0	1
gnl|UMD3.1|GK000010.2	4332538	G	A	0	2	0	1
gnl|UMD3.1|GK000010.2	4335008	C	G	0	2	0	1
gnl|UMD3.1|GK000010.2	4357621	A	T	0	2	0	1
gnl|UMD3.1|GK000010.2	4357626	A	T	0	2	0	1
gnl|UMD3.1|GK000010.2	4357656	A	T	0	2	0	1
gnl|UMD3.1|GK000010.2	4360291	G	A	0	1	0	1
gnl|UMD3.1|GK000010.2	4360292	T	C	0	1	0	1
gnl|UMD3.1|GK000010.2	4360308	G	A	0	2	0	1
gnl|UMD3.1|GK000010.2	4360324	G	A	0	2	0	1
gnl|UMD3.1|GK000010.2	4360333	C	A	0	2	0	1
gnl|UMD3.1|GK000010.2	4360344	A	G	0	3	0	1
gnl|UMD3.1|GK000010.2	4360349	T	C	0	3	0	1
gnl|UMD3.1|GK000010.2	4360350	G	T	0	3	0	1
gnl|UMD3.1|GK000010.2	4360386	A	G	0	2	0	1
gnl|UMD3.1|GK000010.2	4360412	T	G	0	3	0	1
gnl|UMD3.1|GK000010.2	4360415	A	G	0	2	0	1
gnl|UMD3.1|GK000010.2	4360425	C	G	0	2	0	1
gnl|UMD3.1|GK000010.2	4361331	T	G	0	2	0	1
gnl|UMD3.1|GK000010.2	4361342	G	A	0	3	0	1
gnl|UMD3.1|GK000010.2	4361354	G	A	0	4	0	1
gnl|UMD3.1|GK000010.2	4361355	A	G	0	4	0	1
gnl|UMD3.1|GK000010.2	4361361	T	C	0	4	0	1
gnl|UMD3.1|GK000010.2	4375946	C	T	0	14	0	1
gnl|UMD3.1|GK000010.2	4376277	G	A	0	9	0	1
gnl|UMD3.1|GK000010.2	4394335	G	A	0	2	0	1
gnl|UMD3.1|GK000010.2	4395244	A	G	0	1	0	1
gnl|UMD3.1|GK000010.2	4395439	C	A	0	2	0	1
gnl|UMD3.1|GK000010.2	4395601	A	G	0	2	0	1
gnl|UMD3.1|GK000010.2	4404030	C	T	0	3	0	1
gnl|UMD3.1|GK000010.2	4404628	C	T	0	3	0	1
gnl|UMD3.1|GK000010.2	4404629	G	A	1	2	0.333333	0.666667
gnl|UMD3.1|GK000010.2	4404632	A	T	0	3	0	1
gnl|UMD3.1|GK000010.2	4405023	G	A	0	38	0	1
gnl|UMD3.1|GK000010.2	4405192	C	G	0	34	0	1
gnl|UMD3.1|GK000010.2	4406725	T	A	9	2	0.818182	0.181818
gnl|UMD3.1|GK000010.2	4410341	G	T	0	5	0	1
gnl|UMD3.1|GK000010.2	4411022	G	T	2	2	0.5	0.5
gnl|UMD3.1|GK000010.2	4411544	T	A	0	4	0	1
gnl|UMD3.1|GK000010.2	4411699	T	A	7	2	0.777778	0.222222
gnl|UMD3.1|GK000010.2	4411854	A	G	0	6	0	1
gnl|UMD3.1|GK000010.2	4413055	C	T	4	9	0.307692	0.692308
gnl|UMD3.1|GK000010.2	4413366	G	A	0	2	0	1
gnl|UMD3.1|GK000010.2	4416643	C	T	0	5	0	1
gnl|UMD3.1|GK000010.2	4417472	G	A	0	2	0	1
gnl|UMD3.1|GK000010.2	4417481	A	G	0	2	0	1
gnl|UMD3.1|GK000010.2	4598642	T	G	7	12	0.368421	0.631579
gnl|UMD3.1|GK000010.2	4598701	G	A	13	7	0.65	0.35
gnl|UMD3.1|GK000010.2	4598839	T	C	17	19	0.472222	0.527778
gnl|UMD3.1|GK000010.2	4598858	A	G	16	18	0.470588	0.529412
gnl|UMD3.1|GK000010.2	4599026	T	C	9	26	0.257143	0.742857
gnl|UMD3.1|GK000010.2	4599179	G	A	2	2	0.5	0.5
gnl|UMD3.1|GK000010.2	4599187	C	T	2	2	0.5	0.5
gnl|UMD3.1|GK000010.2	4599201	G	A	2	2	0.5	0.5
gnl|UMD3.1|GK000010.2	4599540	A	G	1	2	0.333333	0.666667
gnl|UMD3.1|GK000010.2	4599593	T	C	0	4	0	1
gnl|UMD3.1|GK000010.2	4602397	T	C	11	11	0.5	0.5
gnl|UMD3.1|GK000010.2	4602427	A	T	10	8	0.555556	0.444444
gnl|UMD3.1|GK000010.2	4602846	C	T	1	3	0.25	0.75
gnl|UMD3.1|GK000010.2	4603701	G	A	1	3	0.25	0.75
gnl|UMD3.1|GK000010.2	4604428	A	G	5	2	0.714286	0.285714
gnl|UMD3.1|GK000010.2	4605229	T	C	3	13	0.1875	0.8125
gnl|UMD3.1|GK000010.2	4607497	N	G	0	2	0	1
gnl|UMD3.1|GK000010.2	4607645	C	T	0	3	0	1
gnl|UMD3.1|GK000010.2	4610682	N	T	0	2	0	1
gnl|UMD3.1|GK000010.2	4613377	G	T	0	2	0	1
gnl|UMD3.1|GK000010.2	4615902	T	C	0	2	0	1
gnl|UMD3.1|GK000010.2	4619750	T	C	0	36	0	1
gnl|UMD3.1|GK000010.2	4621687	A	T	1	1	0.5	0.5
gnl|UMD3.1|GK000010.2	4622148	T	C	1	2	0.333333	0.666667
gnl|UMD3.1|GK000010.2	4622406	T	A	2	2	0.5	0.5
gnl|UMD3.1|GK000010.2	4623520	G	A	1	2	0.333333	0.666667
gnl|UMD3.1|GK000010.2	4624121	A	T	1	9	0.1	0.9
gnl|UMD3.1|GK000010.2	4624230	G	A	2	4	0.333333	0.666667
gnl|UMD3.1|GK000010.2	4633783	T	G	4	2	0.666667	0.333333
gnl|UMD3.1|GK000010.2	4635024	T	C	1	2	0.333333	0.666667
gnl|UMD3.1|GK000010.2	4636107	G	A	0	2	0	1
gnl|UMD3.1|GK000010.2	4636799	A	G	0	2	0	1
gnl|UMD3.1|GK000010.2	4640508	A	T	0	3	0	1
gnl|UMD3.1|GK000010.2	4640511	G	T	0	3	0	1
gnl|UMD3.1|GK000010.2	4645413	G	C	0	2	0	1
gnl|UMD3.1|GK000010.2	4650349	C	A	0	3	0	1
gnl|UMD3.1|GK000010.2	4650697	C	G	0	2	0	1
gnl|UMD3.1|GK000010.2	4650869	G	A	0	4	0	1
gnl|UMD3.1|GK000010.2	4653606	T	C	0	1	0	1
gnl|UMD3.1|GK000010.2	4653729	G	A	0	3	0	1
gnl|UMD3.1|GK000010.2	4653767	T	C	0	2	0	1
gnl|UMD3.1|GK000010.2	4658124	G	T	0	2	0	1
gnl|UMD3.1|GK000010.2	4658423	G	A	0	2	0	1
gnl|UMD3.1|GK000010.2	4659915	T	G	0	4	0	1
gnl|UMD3.1|GK000010.2	4660211	C	G	0	2	0	1
gnl|UMD3.1|GK000010.2	4660330	A	G	0	2	0	1
gnl|UMD3.1|GK000010.2	4660511	G	A	0	3	0	1
gnl|UMD3.1|GK000010.2	4660784	A	G	0	4	0	1
gnl|UMD3.1|GK000010.2	4661019	A	G	0	2	0	1
gnl|UMD3.1|GK000010.2	4661041	A	T	0	2	0	1
gnl|UMD3.1|GK000010.2	4661312	G	T	0	2	0	1
gnl|UMD3.1|GK000010.2	4663616	T	G	0	5	0	1
gnl|UMD3.1|GK000010.2	4663658	T	C	0	2	0	1
gnl|UMD3.1|GK000010.2	4665677	G	A	0	3	0	1
gnl|UMD3.1|GK000010.2	4665726	T	C	0	3	0	1
gnl|UMD3.1|GK000010.2	4665910	G	C	0	2	0	1
gnl|UMD3.1|GK000010.2	4665926	G	T	0	2	0	1
gnl|UMD3.1|GK000010.2	4666251	C	T	0	2	0	1
gnl|UMD3.1|GK000010.2	4669561	C	A	0	3	0	1
gnl|UMD3.1|GK000010.2	4669582	G	A	0	3	0	1
gnl|UMD3.1|GK000010.2	4670704	C	T	0	2	0	1
gnl|UMD3.1|GK000010.2	4677199	C	T	0	1	0	1
gnl|UMD3.1|GK000010.2	4679617	T	A	0	1	0	1
gnl|UMD3.1|GK000010.2	4687154	C	T	0	2	0	1
gnl|UMD3.1|GK000010.2	4691938	C	T	0	5	0	1
gnl|UMD3.1|GK000010.2	4692759	A	G	0	3	0	1
gnl|UMD3.1|GK000010.2	4692902	A	T	1	2	0.333333	0.666667
gnl|UMD3.1|GK000010.2	4692976	T	C	0	4	0	1
gnl|UMD3.1|GK000010.2	4693168	A	T	0	2	0	1
gnl|UMD3.1|GK000010.2	4693828	A	G	1	2	0.333333	0.666667
gnl|UMD3.1|GK000010.2	4696232	T	C	0	3	0	1
gnl|UMD3.1|GK000010.2	4696277	T	C	0	2	0	1
gnl|UMD3.1|GK000010.2	4696858	C	T	1	2	0.333333	0.666667
gnl|UMD3.1|GK000010.2	4697337	G	A	2	4	0.333333	0.666667
gnl|UMD3.1|GK000010.2	4697751	T	C	2	3	0.4	0.6
gnl|UMD3.1|GK000010.2	4698132	T	A	0	2	0	1
gnl|UMD3.1|GK000010.2	4700514	C	T	0	4	0	1
gnl|UMD3.1|GK000010.2	4701566	G	T	0	3	0	1
gnl|UMD3.1|GK000010.2	4701784	T	A	1	2	0.333333	0.666667
gnl|UMD3.1|GK000010.2	4705539	C	T	1	3	0.25	0.75
gnl|UMD3.1|GK000010.2	4705541	C	T	1	3	0.25	0.75
gnl|UMD3.1|GK000010.2	4705556	C	T	1	3	0.25	0.75
gnl|UMD3.1|GK000010.2	4705610	A	G	1	2	0.333333	0.666667
gnl|UMD3.1|GK000010.2	4705634	A	G	1	2	0.333333	0.666667
gnl|UMD3.1|GK000010.2	4705654	A	G	0	3	0	1
gnl|UMD3.1|GK000010.2	4705969	A	G	0	2	0	1
gnl|UMD3.1|GK000010.2	4705973	A	G	0	2	0	1
gnl|UMD3.1|GK000010.2	4706167	A	G	0	2	0	1
gnl|UMD3.1|GK000010.2	4706196	A	G	0	2	0	1
gnl|UMD3.1|GK000010.2	4708695	A	T	0	2	0	1
gnl|UMD3.1|GK000010.2	4712515	C	G	0	2	0	1
gnl|UMD3.1|GK000010.2	4712704	G	A	0	3	0	1
gnl|UMD3.1|GK000010.2	4712744	A	G	0	2	0	1
gnl|UMD3.1|GK000010.2	4713335	A	G	3	2	0.6	0.4
gnl|UMD3.1|GK000010.2	4713372	C	T	3	2	0.6	0.4
gnl|UMD3.1|GK000010.2	4713388	A	G	0	5	0	1
gnl|UMD3.1|GK000010.2	4714886	C	T	3	4	0.428571	0.571429
gnl|UMD3.1|GK000010.2	4716645	A	G	10	2	0.833333	0.166667
gnl|UMD3.1|GK000010.2	4718991	A	G	0	2	0	1
gnl|UMD3.1|GK000010.2	4725737	C	T	0	2	0	1
gnl|UMD3.1|GK000010.2	4732978	G	A	0	2	0	1
gnl|UMD3.1|GK000010.2	4839903	C	T	0	2	0	1
gnl|UMD3.1|GK000010.2	4842894	A	G	0	2	0	1
gnl|UMD3.1|GK000010.2	4842903	T	C	0	4	0	1
gnl|UMD3.1|GK000010.2	4842904	T	C	0	4	0	1
gnl|UMD3.1|GK000010.2	4842944	C	T	0	9	0	1
gnl|UMD3.1|GK000010.2	4842950	T	C	0	10	0	1
gnl|UMD3.1|GK000010.2	4843010	C	G	0	11	0	1
gnl|UMD3.1|GK000010.2	4843064	A	G	0	8	0	1
gnl|UMD3.1|GK000010.2	4843070	T	C	0	8	0	1
gnl|UMD3.1|GK000010.2	4843131	A	G	0	12	0	1
gnl|UMD3.1|GK000010.2	4843144	C	T	0	15	0	1
gnl|UMD3.1|GK000010.2	4843315	G	C	0	23	0	1
gnl|UMD3.1|GK000010.2	4843438	T	C	0	37	0	1
gnl|UMD3.1|GK000010.2	4843445	C	A	0	31	0	1
gnl|UMD3.1|GK000010.2	4843572	G	A	0	2	0	1
gnl|UMD3.1|GK000010.2	4843573	A	G	0	2	0	1
gnl|UMD3.1|GK000010.2	4843594	A	G	0	2	0	1
gnl|UMD3.1|GK000010.2	4843596	G	A	0	3	0	1
gnl|UMD3.1|GK000010.2	4843635	C	T	0	3	0	1
gnl|UMD3.1|GK000010.2	4843797	T	G	0	2	0	1
gnl|UMD3.1|GK000010.2	4950808	G	A	2	2	0.5	0.5
gnl|UMD3.1|GK000010.2	4954686	C	A	3	2	0.6	0.4
gnl|UMD3.1|GK000010.2	4954767	T	G	0	1	0	1
gnl|UMD3.1|GK000010.2	4955423	G	A	5	10	0.333333	0.666667
gnl|UMD3.1|GK000010.2	4955466	A	C	7	2	0.777778	0.222222
gnl|UMD3.1|GK000010.2	4959244	T	C	3	4	0.428571	0.571429
gnl|UMD3.1|GK000010.2	4959428	C	A	2	2	0.5	0.5
gnl|UMD3.1|GK000010.2	4960494	A	T	10	2	0.833333	0.166667
gnl|UMD3.1|GK000010.2	4980259	G	T	0	2	0	1
gnl|UMD3.1|GK000010.2	4985980	T	C	1	2	0.333333	0.666667
gnl|UMD3.1|GK000010.2	4988331	C	T	1	2	0.333333	0.666667
gnl|UMD3.1|GK000010.2	4988832	C	T	0	3	0	1
gnl|UMD3.1|GK000010.2	4988839	T	G	1	2	0.333333	0.666667
gnl|UMD3.1|GK000010.2	4990971	C	G	5	2	0.714286	0.285714
gnl|UMD3.1|GK000010.2	4992257	C	G	4	4	0.5	0.5
gnl|UMD3.1|GK000010.2	4992953	C	A	5	2	0.714286	0.285714
gnl|UMD3.1|GK000010.2	5003472	T	C	1	3	0.25	0.75
gnl|UMD3.1|GK000010.2	5009340	T	C	0	2	0	1
gnl|UMD3.1|GK000010.2	5009448	T	C	2	2	0.5	0.5
gnl|UMD3.1|GK000010.2	5010140	C	T	10	4	0.714286	0.285714
gnl|UMD3.1|GK000010.2	5010161	C	T	7	3	0.7	0.3
gnl|UMD3.1|GK000010.2	5010553	C	G	4	6	0.4	0.6
gnl|UMD3.1|GK000010.2	5010601	T	C	2	4	0.333333	0.666667
gnl|UMD3.1|GK000010.2	5011027	C	A	5	2	0.714286	0.285714
gnl|UMD3.1|GK000010.2	5017246	G	A	1	2	0.333333	0.666667
gnl|UMD3.1|GK000010.2	5029383	C	A	0	2	0	1
gnl|UMD3.1|GK000010.2	5031387	G	A	1	2	0.333333	0.666667
gnl|UMD3.1|GK000010.2	5031486	A	T	0	3	0	1
gnl|UMD3.1|GK000010.2	5032659	C	T	0	1	0	1
gnl|UMD3.1|GK000010.2	5033769	T	C	0	2	0	1
gnl|UMD3.1|GK000010.2	5041100	T	C	0	2	0	1
gnl|UMD3.1|GK000010.2	5041880	A	T	0	2	0	1
gnl|UMD3.1|GK000010.2	5122970	G	C	4	2	0.666667	0.333333
gnl|UMD3.1|GK000010.2	5133229	T	C	8	2	0.8	0.2
gnl|UMD3.1|GK000010.2	5137720	T	A	1	2	0.333333	0.666667
gnl|UMD3.1|GK000010.2	5139664	C	T	2	2	0.5	0.5
gnl|UMD3.1|GK000010.2	5212193	A	G	0	2	0	1
gnl|UMD3.1|GK000010.2	5212283	T	G	0	23	0	1
gnl|UMD3.1|GK000010.2	5212981	A	G	0	80	0	1
gnl|UMD3.1|GK000010.2	5214547	T	A	0	51	0	1
gnl|UMD3.1|GK000010.2	5215229	T	C	0	31	0	1
gnl|UMD3.1|GK000010.2	5215498	C	T	0	30	0	1
gnl|UMD3.1|GK000010.2	5217571	T	C	0	4	0	1
gnl|UMD3.1|GK000010.2	5219424	A	G	0	3	0	1
gnl|UMD3.1|GK000010.2	5223275	C	T	0	2	0	1
gnl|UMD3.1|GK000010.2	5225606	C	G	0	3	0	1
gnl|UMD3.1|GK000010.2	5225608	T	A	0	3	0	1
gnl|UMD3.1|GK000010.2	5225648	T	G	0	7	0	1
gnl|UMD3.1|GK000010.2	5227036	C	A	0	2	0	1
gnl|UMD3.1|GK000010.2	5229977	A	G	0	2	0	1
gnl|UMD3.1|GK000010.2	5234927	T	C	0	2	0	1
gnl|UMD3.1|GK000010.2	5238497	T	C	0	3	0	1
gnl|UMD3.1|GK000010.2	5241639	A	G	3	2	0.6	0.4
gnl|UMD3.1|GK000010.2	5244651	C	T	0	2	0	1
gnl|UMD3.1|GK000010.2	5245405	G	A	2	2	0.5	0.5
gnl|UMD3.1|GK000010.2	5246549	C	G	0	2	0	1
gnl|UMD3.1|GK000010.2	5248640	C	A	3	2	0.6	0.4
gnl|UMD3.1|GK000010.2	5248672	T	C	0	5	0	1
gnl|UMD3.1|GK000010.2	5248706	C	T	0	4	0	1
gnl|UMD3.1|GK000010.2	5249920	G	C	0	2	0	1
gnl|UMD3.1|GK000010.2	5250304	A	G	0	2	0	1
gnl|UMD3.1|GK000010.2	5255757	A	C	0	2	0	1
gnl|UMD3.1|GK000010.2	5256968	C	T	0	2	0	1
gnl|UMD3.1|GK000010.2	5257015	G	C	0	2	0	1
gnl|UMD3.1|GK000010.2	5258375	T	C	0	3	0	1
gnl|UMD3.1|GK000010.2	5258424	T	C	0	2	0	1
gnl|UMD3.1|GK000010.2	5260088	C	A	0	3	0	1
gnl|UMD3.1|GK000010.2	5260100	C	T	0	3	0	1
gnl|UMD3.1|GK000010.2	5260182	T	G	0	2	0	1
gnl|UMD3.1|GK000010.2	5260239	T	C	0	2	0	1
gnl|UMD3.1|GK000010.2	5264150	T	C	0	1	0	1
gnl|UMD3.1|GK000010.2	5267179	T	C	0	2	0	1
gnl|UMD3.1|GK000010.2	5267188	T	C	0	2	0	1
gnl|UMD3.1|GK000010.2	5267237	T	C	0	1	0	1
gnl|UMD3.1|GK000010.2	5267238	T	C	0	2	0	1
gnl|UMD3.1|GK000010.2	5270906	A	C	3	2	0.6	0.4
gnl|UMD3.1|GK000010.2	5278174	G	A	3	2	0.6	0.4
gnl|UMD3.1|GK000010.2	5281479	A	G	0	9	0	1
gnl|UMD3.1|GK000010.2	5291876	A	T	2	2	0.5	0.5
gnl|UMD3.1|GK000010.2	5302169	T	C	0	3	0	1
gnl|UMD3.1|GK000010.2	5551316	G	A	0	6	0	1
gnl|UMD3.1|GK000010.2	5551475	A	G	0	15	0	1
gnl|UMD3.1|GK000010.2	5551542	C	T	0	25	0	1
gnl|UMD3.1|GK000010.2	5552596	A	T	0	38	0	1
gnl|UMD3.1|GK000010.2	5555581	C	T	0	4	0	1
gnl|UMD3.1|GK000010.2	5555877	C	T	0	2	0	1
gnl|UMD3.1|GK000010.2	5556238	A	C	0	6	0	1
gnl|UMD3.1|GK000010.2	5556239	C	T	0	6	0	1
gnl|UMD3.1|GK000010.2	5556240	C	T	0	6	0	1
gnl|UMD3.1|GK000010.2	5556242	G	A	0	6	0	1
gnl|UMD3.1|GK000010.2	5556243	G	T	0	6	0	1
gnl|UMD3.1|GK000010.2	5557246	T	C	0	6	0	1
gnl|UMD3.1|GK000010.2	5557946	G	T	0	4	0	1
gnl|UMD3.1|GK000010.2	5558051	T	A	0	6	0	1
gnl|UMD3.1|GK000010.2	5558413	T	C	0	4	0	1
gnl|UMD3.1|GK000010.2	5558651	A	G	0	2	0	1
gnl|UMD3.1|GK000010.2	5559298	A	G	0	3	0	1
gnl|UMD3.1|GK000010.2	5559430	A	G	0	3	0	1
gnl|UMD3.1|GK000010.2	5559431	T	C	0	3	0	1
gnl|UMD3.1|GK000010.2	5559459	T	C	0	6	0	1
gnl|UMD3.1|GK000010.2	5559534	T	C	0	8	0	1
gnl|UMD3.1|GK000010.2	5559547	G	A	0	8	0	1
gnl|UMD3.1|GK000010.2	5559586	A	C	0	5	0	1
gnl|UMD3.1|GK000010.2	5559609	C	T	0	3	0	1
gnl|UMD3.1|GK000010.2	5559627	A	C	0	4	0	1
gnl|UMD3.1|GK000010.2	5559664	G	C	0	3	0	1
gnl|UMD3.1|GK000010.2	5559717	T	G	0	2	0	1
gnl|UMD3.1|GK000010.2	5560163	T	C	0	2	0	1
gnl|UMD3.1|GK000010.2	5560279	C	A	0	4	0	1
gnl|UMD3.1|GK000010.2	5560399	C	T	0	5	0	1
gnl|UMD3.1|GK000010.2	5560411	A	G	0	5	0	1
gnl|UMD3.1|GK000010.2	5560768	C	T	0	3	0	1
gnl|UMD3.1|GK000010.2	5561023	A	C	1	2	0.333333	0.666667
gnl|UMD3.1|GK000010.2	5561457	C	A	0	9	0	1
gnl|UMD3.1|GK000010.2	5561588	G	A	0	2	0	1
gnl|UMD3.1|GK000010.2	5561604	A	G	0	3	0	1
gnl|UMD3.1|GK000010.2	5561622	G	A	0	5	0	1
gnl|UMD3.1|GK000010.2	5561647	C	T	0	5	0	1
gnl|UMD3.1|GK000010.2	5561663	G	A	0	5	0	1
gnl|UMD3.1|GK000010.2	5561715	G	A	6	2	0.75	0.25
gnl|UMD3.1|GK000010.2	5561744	C	T	0	6	0	1
gnl|UMD3.1|GK000010.2	5561826	T	C	0	6	0	1
gnl|UMD3.1|GK000010.2	5562043	A	G	0	4	0	1
gnl|UMD3.1|GK000010.2	5562075	A	G	0	1	0	1
gnl|UMD3.1|GK000010.2	5562082	G	A	0	2	0	1
gnl|UMD3.1|GK000010.2	5562264	T	A	0	4	0	1
gnl|UMD3.1|GK000010.2	5562304	G	A	0	3	0	1
gnl|UMD3.1|GK000010.2	5562409	G	T	0	3	0	1
gnl|UMD3.1|GK000010.2	5562602	T	A	0	4	0	1
gnl|UMD3.1|GK000010.2	5562616	T	C	0	4	0	1
gnl|UMD3.1|GK000010.2	5562663	C	T	0	4	0	1
gnl|UMD3.1|GK000010.2	5563417	T	C	0	3	0	1
gnl|UMD3.1|GK000010.2	5563429	C	G	0	3	0	1
gnl|UMD3.1|GK000010.2	5563448	C	T	0	2	0	1
gnl|UMD3.1|GK000010.2	5563462	G	T	0	2	0	1
gnl|UMD3.1|GK000010.2	5563464	G	A	0	2	0	1
gnl|UMD3.1|GK000010.2	5563465	T	C	0	2	0	1
gnl|UMD3.1|GK000010.2	5563498	T	C	0	2	0	1
gnl|UMD3.1|GK000010.2	5564585	G	A	0	2	0	1
gnl|UMD3.1|GK000010.2	5564736	A	G	0	2	0	1
gnl|UMD3.1|GK000010.2	5565840	T	C	0	4	0	1
gnl|UMD3.1|GK000010.2	5566041	C	T	0	3	0	1
gnl|UMD3.1|GK000010.2	5566071	A	C	0	3	0	1
gnl|UMD3.1|GK000010.2	5566679	C	A	0	2	0	1
gnl|UMD3.1|GK000010.2	5566747	G	A	0	3	0	1
gnl|UMD3.1|GK000010.2	5566782	C	T	0	2	0	1
gnl|UMD3.1|GK000010.2	5567132	A	G	0	2	0	1
gnl|UMD3.1|GK000010.2	5567972	T	A	0	2	0	1
gnl|UMD3.1|GK000010.2	5568026	C	G	0	2	0	1
gnl|UMD3.1|GK000010.2	5568268	C	T	0	2	0	1
gnl|UMD3.1|GK000010.2	5568325	C	T	0	2	0	1
gnl|UMD3.1|GK000010.2	5568818	C	T	0	1	0	1
gnl|UMD3.1|GK000010.2	5569450	A	T	0	2	0	1
gnl|UMD3.1|GK000010.2	5570357	T	C	0	2	0	1
gnl|UMD3.1|GK000010.2	5570921	C	G	0	2	0	1
gnl|UMD3.1|GK000010.2	5577771	G	A	0	3	0	1
gnl|UMD3.1|GK000010.2	5580254	T	C	0	2	0	1
gnl|UMD3.1|GK000010.2	5584340	T	C	0	2	0	1
gnl|UMD3.1|GK000010.2	5587112	T	C	0	1	0	1
gnl|UMD3.1|GK000010.2	5592428	A	G	0	2	0	1
gnl|UMD3.1|GK000010.2	5602453	T	C	0	2	0	1
gnl|UMD3.1|GK000010.2	5611934	A	G	0	2	0	1
gnl|UMD3.1|GK000010.2	5656560	A	C	0	4	0	1
gnl|UMD3.1|GK000010.2	6181796	T	G	0	2	0	1
gnl|UMD3.1|GK000010.2	6181803	A	G	0	2	0	1
gnl|UMD3.1|GK000010.2	6181822	C	A	0	2	0	1
gnl|UMD3.1|GK000010.2	6181831	C	A	0	2	0	1
gnl|UMD3.1|GK000010.2	6181861	G	A	0	2	0	1
gnl|UMD3.1|GK000010.2	6181877	C	A	0	2	0	1
gnl|UMD3.1|GK000010.2	6181893	T	C	0	2	0	1
gnl|UMD3.1|GK000010.2	6429968	C	T	2	2	0.5	0.5
gnl|UMD3.1|GK000010.2	6430042	G	C	2	3	0.4	0.6
gnl|UMD3.1|GK000010.2	6430105	G	A	0	3	0	1
gnl|UMD3.1|GK000010.2	6430571	T	C	1	4	0.2	0.8
gnl|UMD3.1|GK000010.2	6430610	A	G	1	5	0.166667	0.833333
gnl|UMD3.1|GK000010.2	6430676	G	A	2	4	0.333333	0.666667
gnl|UMD3.1|GK000010.2	6431588	C	T	1	2	0.333333	0.666667
gnl|UMD3.1|GK000010.2	6431592	C	A	1	2	0.333333	0.666667
gnl|UMD3.1|GK000010.2	6431598	T	C	1	2	0.333333	0.666667
gnl|UMD3.1|GK000010.2	6431609	G	A	1	1	0.5	0.5
gnl|UMD3.1|GK000010.2	6431928	T	C	0	2	0	1
gnl|UMD3.1|GK000010.2	6437285	A	G	0	2	0	1
gnl|UMD3.1|GK000010.2	6440091	T	C	1	3	0.25	0.75
gnl|UMD3.1|GK000010.2	6440101	T	C	1	3	0.25	0.75
gnl|UMD3.1|GK000010.2	6440885	C	T	0	2	0	1
gnl|UMD3.1|GK000010.2	6446946	G	T	0	2	0	1
gnl|UMD3.1|GK000010.2	6452089	T	C	0	2	0	1
gnl|UMD3.1|GK000010.2	6452092	T	C	0	2	0	1
gnl|UMD3.1|GK000010.2	6452097	T	C	0	2	0	1
gnl|UMD3.1|GK000010.2	6497969	A	G	0	2	0	1
gnl|UMD3.1|GK000010.2	6498160	A	G	0	4	0	1
gnl|UMD3.1|GK000010.2	6561454	T	C	0	2	0	1
gnl|UMD3.1|GK000010.2	6646785	C	T	2	7	0.222222	0.777778
gnl|UMD3.1|GK000010.2	6698258	T	A	0	2	0	1
gnl|UMD3.1|GK000010.2	6699160	C	T	0	2	0	1
gnl|UMD3.1|GK000010.2	6699185	G	A	0	2	0	1
gnl|UMD3.1|GK000010.2	6699186	C	G	0	2	0	1
gnl|UMD3.1|GK000010.2	6699206	T	C	0	2	0	1
gnl|UMD3.1|GK000010.2	6699992	A	T	0	2	0	1
gnl|UMD3.1|GK000010.2	6701474	A	C	0	5	0	1
gnl|UMD3.1|GK000010.2	6704699	G	T	0	2	0	1
gnl|UMD3.1|GK000010.2	6706438	T	C	0	2	0	1
gnl|UMD3.1|GK000010.2	6707421	G	A	0	3	0	1
gnl|UMD3.1|GK000010.2	6709743	C	T	9	9	0.5	0.5
gnl|UMD3.1|GK000010.2	6710113	G	A	0	2	0	1
gnl|UMD3.1|GK000010.2	6710974	G	C	1	2	0.333333	0.666667
gnl|UMD3.1|GK000010.2	6715813	A	G	0	3	0	1
gnl|UMD3.1|GK000010.2	6721692	G	C	0	4	0	1
gnl|UMD3.1|GK000010.2	6721704	G	A	2	2	0.5	0.5
gnl|UMD3.1|GK000010.2	6722177	T	A	0	2	0	1
gnl|UMD3.1|GK000010.2	6724516	C	T	0	38	0	1
gnl|UMD3.1|GK000010.2	6725388	G	A	0	7	0	1
gnl|UMD3.1|GK000010.2	6725409	C	G	2	3	0.4	0.6
gnl|UMD3.1|GK000010.2	6725652	T	G	0	3	0	1
gnl|UMD3.1|GK000010.2	6725690	A	G	0	3	0	1
gnl|UMD3.1|GK000010.2	6725875	G	A	0	3	0	1
gnl|UMD3.1|GK000010.2	6725881	C	T	1	2	0.333333	0.666667
gnl|UMD3.1|GK000010.2	6725889	A	G	1	2	0.333333	0.666667
gnl|UMD3.1|GK000010.2	6726459	C	A	0	2	0	1
gnl|UMD3.1|GK000010.2	6726762	T	A	1	2	0.333333	0.666667
gnl|UMD3.1|GK000010.2	6727641	A	C	2	2	0.5	0.5
gnl|UMD3.1|GK000010.2	6727642	C	A	2	2	0.5	0.5
gnl|UMD3.1|GK000010.2	6732160	T	C	0	3	0	1
gnl|UMD3.1|GK000010.2	6746703	T	C	0	7	0	1
gnl|UMD3.1|GK000010.2	6747481	T	A	0	2	0	1
gnl|UMD3.1|GK000010.2	6751254	T	C	0	2	0	1
gnl|UMD3.1|GK000010.2	6751589	G	A	0	2	0	1
gnl|UMD3.1|GK000010.2	6751821	T	G	0	3	0	1
gnl|UMD3.1|GK000010.2	6753084	T	C	0	4	0	1
gnl|UMD3.1|GK000010.2	6754902	G	A	0	2	0	1
gnl|UMD3.1|GK000010.2	6757458	T	G	0	2	0	1
gnl|UMD3.1|GK000010.2	6761000	C	T	6	2	0.75	0.25
gnl|UMD3.1|GK000010.2	6763672	A	G	0	2	0	1
gnl|UMD3.1|GK000010.2	6765982	G	A	0	2	0	1
gnl|UMD3.1|GK000010.2	6769288	A	G	0	1	0	1
gnl|UMD3.1|GK000010.2	6771115	T	A	0	2	0	1
gnl|UMD3.1|GK000010.2	6771803	A	T	0	2	0	1
gnl|UMD3.1|GK000010.2	6776502	G	A	0	2	0	1
gnl|UMD3.1|GK000010.2	6779086	T	C	0	2	0	1
gnl|UMD3.1|GK000010.2	6782716	T	G	0	2	0	1
gnl|UMD3.1|GK000010.2	6785768	T	C	9	3	0.75	0.25
gnl|UMD3.1|GK000010.2	6785835	T	C	3	4	0.428571	0.571429
gnl|UMD3.1|GK000010.2	6785844	G	A	0	6	0	1
gnl|UMD3.1|GK000010.2	6786732	T	C	2	2	0.5	0.5
gnl|UMD3.1|GK000010.2	6786756	T	C	0	3	0	1
gnl|UMD3.1|GK000010.2	6787060	G	T	1	1	0.5	0.5
gnl|UMD3.1|GK000010.2	6789186	A	G	0	2	0	1
gnl|UMD3.1|GK000010.2	6800035	C	A	0	2	0	1
gnl|UMD3.1|GK000010.2	6800278	A	C	0	3	0	1
gnl|UMD3.1|GK000010.2	6803982	A	G	0	3	0	1
gnl|UMD3.1|GK000010.2	6804952	A	G	0	3	0	1
gnl|UMD3.1|GK000010.2	6826685	C	T	0	2	0	1
gnl|UMD3.1|GK000010.2	6830323	G	T	0	2	0	1
gnl|UMD3.1|GK000010.2	6832881	T	C	0	2	0	1
gnl|UMD3.1|GK000010.2	6833736	C	G	0	2	0	1
gnl|UMD3.1|GK000010.2	6842940	A	T	0	4	0	1
gnl|UMD3.1|GK000010.2	6853252	A	G	0	4	0	1
gnl|UMD3.1|GK000010.2	6853383	N	T	0	5	0	1
gnl|UMD3.1|GK000010.2	6856238	C	A	0	2	0	1
gnl|UMD3.1|GK000010.2	6861445	T	A	0	2	0	1
gnl|UMD3.1|GK000010.2	6862457	C	T	0	3	0	1
gnl|UMD3.1|GK000010.2	6862535	T	C	0	7	0	1
gnl|UMD3.1|GK000010.2	6867440	A	T	0	2	0	1
gnl|UMD3.1|GK000010.2	6869207	T	A	0	2	0	1
gnl|UMD3.1|GK000010.2	6872417	G	C	0	2	0	1
gnl|UMD3.1|GK000010.2	6872832	A	G	0	3	0	1
gnl|UMD3.1|GK000010.2	6873014	A	T	0	2	0	1
gnl|UMD3.1|GK000010.2	6873017	G	A	0	2	0	1
gnl|UMD3.1|GK000010.2	6873039	T	C	0	2	0	1
gnl|UMD3.1|GK000010.2	6873126	C	T	0	3	0	1
gnl|UMD3.1|GK000010.2	6873144	A	T	0	4	0	1
gnl|UMD3.1|GK000010.2	6873274	T	C	0	2	0	1
gnl|UMD3.1|GK000010.2	6873872	T	C	0	3	0	1
gnl|UMD3.1|GK000010.2	6873963	T	C	0	2	0	1
gnl|UMD3.1|GK000010.2	6874089	C	T	0	3	0	1
gnl|UMD3.1|GK000010.2	6874160	C	T	0	3	0	1
gnl|UMD3.1|GK000010.2	6880689	A	G	0	4	0	1
gnl|UMD3.1|GK000010.2	6880720	G	A	0	4	0	1
gnl|UMD3.1|GK000010.2	6880799	G	C	0	3	0	1
gnl|UMD3.1|GK000010.2	6880901	A	G	0	1	0	1
gnl|UMD3.1|GK000010.2	6881030	G	T	0	2	0	1
gnl|UMD3.1|GK000010.2	6883784	G	T	0	2	0	1
gnl|UMD3.1|GK000010.2	6885855	A	G	2	2	0.5	0.5
gnl|UMD3.1|GK000010.2	6887999	G	C	0	3	0	1
gnl|UMD3.1|GK000010.2	6890333	A	G	0	3	0	1
gnl|UMD3.1|GK000010.2	6890770	G	A	0	2	0	1
gnl|UMD3.1|GK000010.2	6890825	G	A	0	3	0	1
gnl|UMD3.1|GK000010.2	6891770	G	C	0	2	0	1
gnl|UMD3.1|GK000010.2	6892363	G	A	0	2	0	1
gnl|UMD3.1|GK000010.2	6893127	T	C	0	3	0	1
gnl|UMD3.1|GK000010.2	6894131	G	A	0	3	0	1
gnl|UMD3.1|GK000010.2	6894134	A	T	0	3	0	1
gnl|UMD3.1|GK000010.2	6894256	G	T	0	3	0	1
gnl|UMD3.1|GK000010.2	6894278	T	C	0	3	0	1
gnl|UMD3.1|GK000010.2	6894527	T	C	0	2	0	1
gnl|UMD3.1|GK000010.2	6894528	G	T	0	2	0	1
gnl|UMD3.1|GK000010.2	6894598	T	A	0	3	0	1
gnl|UMD3.1|GK000010.2	6895202	G	A	0	2	0	1
gnl|UMD3.1|GK000010.2	6895241	G	T	0	2	0	1
gnl|UMD3.1|GK000010.2	6895337	T	C	0	2	0	1
gnl|UMD3.1|GK000010.2	6896090	C	T	0	2	0	1
gnl|UMD3.1|GK000010.2	6896149	A	G	0	2	0	1
gnl|UMD3.1|GK000010.2	6897487	G	A	0	2	0	1
gnl|UMD3.1|GK000010.2	6897636	C	G	1	2	0.333333	0.666667
gnl|UMD3.1|GK000010.2	6898482	T	C	0	2	0	1
gnl|UMD3.1|GK000010.2	6898483	G	A	0	2	0	1
gnl|UMD3.1|GK000010.2	6898766	T	C	0	2	0	1
gnl|UMD3.1|GK000010.2	6899346	G	A	0	5	0	1
gnl|UMD3.1|GK000010.2	6900404	C	T	0	2	0	1
gnl|UMD3.1|GK000010.2	6900482	A	G	0	7	0	1
gnl|UMD3.1|GK000010.2	6900521	A	G	0	6	0	1
gnl|UMD3.1|GK000010.2	6901819	A	G	2	2	0.5	0.5
gnl|UMD3.1|GK000010.2	6901865	T	C	0	4	0	1
gnl|UMD3.1|GK000010.2	6901895	C	A	0	3	0	1
gnl|UMD3.1|GK000010.2	6901906	A	G	0	2	0	1
gnl|UMD3.1|GK000010.2	6902019	G	A	0	2	0	1
gnl|UMD3.1|GK000010.2	6902236	A	C	0	3	0	1
gnl|UMD3.1|GK000010.2	6902316	G	T	0	5	0	1
gnl|UMD3.1|GK000010.2	6904780	G	T	1	1	0.5	0.5
gnl|UMD3.1|GK000010.2	6916637	G	T	0	2	0	1
gnl|UMD3.1|GK000010.2	6916902	G	A	0	2	0	1
gnl|UMD3.1|GK000010.2	6917165	T	C	0	2	0	1
gnl|UMD3.1|GK000010.2	6918559	C	T	0	2	0	1
gnl|UMD3.1|GK000010.2	6919140	A	G	0	2	0	1
gnl|UMD3.1|GK000010.2	6919233	G	T	0	2	0	1
gnl|UMD3.1|GK000010.2	6920594	T	C	0	2	0	1
gnl|UMD3.1|GK000010.2	6923507	G	A	0	3	0	1
gnl|UMD3.1|GK000010.2	6923617	A	G	0	4	0	1
gnl|UMD3.1|GK000010.2	6925451	A	G	0	4	0	1
gnl|UMD3.1|GK000010.2	6931858	C	T	0	19	0	1
gnl|UMD3.1|GK000010.2	6932130	T	A	0	12	0	1
gnl|UMD3.1|GK000010.2	6932135	G	A	0	12	0	1
gnl|UMD3.1|GK000010.2	6933103	C	G	0	2	0	1
gnl|UMD3.1|GK000010.2	6933177	T	C	0	12	0	1
gnl|UMD3.1|GK000010.2	7013051	C	T	0	2	0	1
gnl|UMD3.1|GK000010.2	7013060	T	A	1	2	0.333333	0.666667
gnl|UMD3.1|GK000010.2	7013862	G	A	4	2	0.666667	0.333333
gnl|UMD3.1|GK000010.2	7019499	T	A	0	2	0	1
gnl|UMD3.1|GK000010.2	7020788	C	T	0	2	0	1
gnl|UMD3.1|GK000010.2	7021119	A	G	6	2	0.75	0.25
gnl|UMD3.1|GK000010.2	7025901	C	T	2	4	0.333333	0.666667
gnl|UMD3.1|GK000010.2	7025922	A	G	1	8	0.111111	0.888889
gnl|UMD3.1|GK000010.2	7027356	G	T	4	2	0.666667	0.333333
gnl|UMD3.1|GK000010.2	7030951	T	C	2	4	0.333333	0.666667
gnl|UMD3.1|GK000010.2	7033635	C	T	0	4	0	1
gnl|UMD3.1|GK000010.2	7033892	A	T	1	3	0.25	0.75
gnl|UMD3.1|GK000010.2	7033901	A	G	0	4	0	1
gnl|UMD3.1|GK000010.2	7033918	C	T	1	4	0.2	0.8
gnl|UMD3.1|GK000010.2	7033924	A	G	1	4	0.2	0.8
gnl|UMD3.1|GK000010.2	7033988	T	G	0	4	0	1
gnl|UMD3.1|GK000010.2	7034727	T	C	0	2	0	1
gnl|UMD3.1|GK000010.2	7034788	C	T	0	2	0	1
gnl|UMD3.1|GK000010.2	7035711	G	C	2	2	0.5	0.5
gnl|UMD3.1|GK000010.2	7035736	C	G	1	2	0.333333	0.666667
gnl|UMD3.1|GK000010.2	7038608	C	T	0	2	0	1
gnl|UMD3.1|GK000010.2	7040586	C	T	3	4	0.428571	0.571429
gnl|UMD3.1|GK000010.2	7040954	A	G	1	2	0.333333	0.666667
gnl|UMD3.1|GK000010.2	7044005	G	A	3	2	0.6	0.4
gnl|UMD3.1|GK000010.2	7044123	C	G	4	2	0.666667	0.333333
gnl|UMD3.1|GK000010.2	7044425	C	A	1	2	0.333333	0.666667
gnl|UMD3.1|GK000010.2	7046534	C	A	1	1	0.5	0.5
gnl|UMD3.1|GK000010.2	7046559	C	T	1	2	0.333333	0.666667
gnl|UMD3.1|GK000010.2	7308026	C	T	0	2	0	1
gnl|UMD3.1|GK000010.2	7308074	T	C	0	2	0	1
gnl|UMD3.1|GK000010.2	7308110	G	A	0	2	0	1
gnl|UMD3.1|GK000010.2	7341807	C	T	0	2	0	1
gnl|UMD3.1|GK000010.2	7350762	G	A	1	3	0.25	0.75
gnl|UMD3.1|GK000010.2	7357907	A	G	0	2	0	1
gnl|UMD3.1|GK000010.2	7357931	G	T	0	3	0	1
gnl|UMD3.1|GK000010.2	7373633	C	T	0	2	0	1
gnl|UMD3.1|GK000010.2	7395053	C	T	0	2	0	1
gnl|UMD3.1|GK000010.2	7395114	T	C	0	2	0	1
gnl|UMD3.1|GK000010.2	7395144	T	C	0	2	0	1
gnl|UMD3.1|GK000010.2	7397696	A	G	0	2	0	1
gnl|UMD3.1|GK000010.2	7398990	C	A	1	2	0.333333	0.666667
gnl|UMD3.1|GK000010.2	7398999	A	G	1	2	0.333333	0.666667
gnl|UMD3.1|GK000010.2	7399917	C	T	0	2	0	1
gnl|UMD3.1|GK000010.2	7416242	A	G	0	2	0	1
gnl|UMD3.1|GK000010.2	7416985	G	T	0	2	0	1
gnl|UMD3.1|GK000010.2	7486104	T	C	0	2	0	1
gnl|UMD3.1|GK000010.2	7486118	A	G	0	2	0	1
gnl|UMD3.1|GK000010.2	7486164	A	G	0	2	0	1
gnl|UMD3.1|GK000010.2	7486167	G	A	0	2	0	1
gnl|UMD3.1|GK000010.2	7506008	G	T	0	2	0	1
gnl|UMD3.1|GK000010.2	7506291	C	T	0	2	0	1
gnl|UMD3.1|GK000010.2	7506459	T	A	4	2	0.666667	0.333333
gnl|UMD3.1|GK000010.2	7506519	A	G	0	3	0	1
gnl|UMD3.1|GK000010.2	7506537	C	G	0	2	0	1
gnl|UMD3.1|GK000010.2	7507035	G	A	0	2	0	1
gnl|UMD3.1|GK000010.2	7507166	A	G	0	4	0	1
gnl|UMD3.1|GK000010.2	7507333	A	T	0	3	0	1
gnl|UMD3.1|GK000010.2	7507338	T	C	0	3	0	1
gnl|UMD3.1|GK000010.2	7508022	T	G	0	2	0	1
gnl|UMD3.1|GK000010.2	7508223	T	C	0	4	0	1
gnl|UMD3.1|GK000010.2	7509810	T	C	0	2	0	1
gnl|UMD3.1|GK000010.2	7509892	A	G	0	3	0	1
gnl|UMD3.1|GK000010.2	7509925	T	G	3	2	0.6	0.4
gnl|UMD3.1|GK000010.2	7509953	C	T	0	5	0	1
gnl|UMD3.1|GK000010.2	7510040	A	C	0	3	0	1
gnl|UMD3.1|GK000010.2	7510101	G	T	0	2	0	1
gnl|UMD3.1|GK000010.2	7510110	C	T	0	2	0	1
gnl|UMD3.1|GK000010.2	7510123	T	G	0	2	0	1
gnl|UMD3.1|GK000010.2	7510158	C	T	0	2	0	1
gnl|UMD3.1|GK000010.2	7510685	A	G	0	4	0	1
gnl|UMD3.1|GK000010.2	7530996	G	C	0	2	0	1
gnl|UMD3.1|GK000010.2	7570729	G	A	1	2	0.333333	0.666667
gnl|UMD3.1|GK000010.2	7596812	A	G	0	3	0	1
gnl|UMD3.1|GK000010.2	7596852	C	G	0	3	0	1
gnl|UMD3.1|GK000010.2	7596870	C	T	0	3	0	1
gnl|UMD3.1|GK000010.2	7596892	C	T	0	3	0	1
gnl|UMD3.1|GK000010.2	7598401	C	G	0	2	0	1
gnl|UMD3.1|GK000010.2	7598435	G	C	0	2	0	1
gnl|UMD3.1|GK000010.2	7608548	G	T	0	2	0	1
gnl|UMD3.1|GK000010.2	7616253	C	T	0	3	0	1
gnl|UMD3.1|GK000010.2	7617674	A	G	0	2	0	1
gnl|UMD3.1|GK000010.2	7619725	A	C	0	5	0	1
gnl|UMD3.1|GK000010.2	7619876	T	C	0	3	0	1
gnl|UMD3.1|GK000010.2	7620299	T	C	0	3	0	1
gnl|UMD3.1|GK000010.2	7620585	C	T	0	2	0	1
gnl|UMD3.1|GK000010.2	7620620	G	A	0	2	0	1
gnl|UMD3.1|GK000010.2	7620629	T	C	0	2	0	1
gnl|UMD3.1|GK000010.2	7622193	T	G	0	2	0	1
gnl|UMD3.1|GK000010.2	7622210	C	T	2	2	0.5	0.5
gnl|UMD3.1|GK000010.2	7622235	T	C	0	4	0	1
gnl|UMD3.1|GK000010.2	7622859	A	T	0	2	0	1
gnl|UMD3.1|GK000010.2	7625468	A	G	0	2	0	1
gnl|UMD3.1|GK000010.2	7629110	T	C	0	2	0	1
gnl|UMD3.1|GK000010.2	7629126	C	T	0	2	0	1
gnl|UMD3.1|GK000010.2	7630352	T	C	0	2	0	1
gnl|UMD3.1|GK000010.2	7631950	A	G	0	2	0	1
gnl|UMD3.1|GK000010.2	7633804	A	G	1	2	0.333333	0.666667
gnl|UMD3.1|GK000010.2	7635675	G	C	2	2	0.5	0.5
gnl|UMD3.1|GK000010.2	7637315	G	T	0	2	0	1
gnl|UMD3.1|GK000010.2	7642526	T	G	0	2	0	1
gnl|UMD3.1|GK000010.2	7645604	C	T	0	1	0	1
gnl|UMD3.1|GK000010.2	7647402	C	T	0	2	0	1
gnl|UMD3.1|GK000010.2	7649196	C	T	0	2	0	1
gnl|UMD3.1|GK000010.2	7649213	G	A	0	1	0	1
gnl|UMD3.1|GK000010.2	7650516	C	A	0	2	0	1
gnl|UMD3.1|GK000010.2	7650539	G	A	0	2	0	1
gnl|UMD3.1|GK000010.2	7650543	C	A	0	2	0	1
gnl|UMD3.1|GK000010.2	7650568	T	C	0	2	0	1
gnl|UMD3.1|GK000010.2	7652723	A	G	0	2	0	1
gnl|UMD3.1|GK000010.2	7652762	T	C	0	3	0	1
gnl|UMD3.1|GK000010.2	7652773	C	T	0	3	0	1
gnl|UMD3.1|GK000010.2	7652814	A	G	0	4	0	1
gnl|UMD3.1|GK000010.2	7652881	C	G	0	1	0	1
gnl|UMD3.1|GK000010.2	7653171	C	A	0	2	0	1
gnl|UMD3.1|GK000010.2	7653277	T	C	0	2	0	1
gnl|UMD3.1|GK000010.2	7653372	T	A	0	2	0	1
gnl|UMD3.1|GK000010.2	7653457	T	C	0	3	0	1
gnl|UMD3.1|GK000010.2	7653488	C	G	0	3	0	1
gnl|UMD3.1|GK000010.2	7654201	G	T	0	3	0	1
gnl|UMD3.1|GK000010.2	7654294	G	T	0	4	0	1
gnl|UMD3.1|GK000010.2	7654636	C	G	0	4	0	1
gnl|UMD3.1|GK000010.2	7654695	T	C	0	3	0	1
gnl|UMD3.1|GK000010.2	7654725	G	T	0	2	0	1
gnl|UMD3.1|GK000010.2	7654758	T	C	0	3	0	1
gnl|UMD3.1|GK000010.2	7654783	T	C	0	3	0	1
gnl|UMD3.1|GK000010.2	7654798	G	A	0	2	0	1
gnl|UMD3.1|GK000010.2	7654818	G	A	0	3	0	1
gnl|UMD3.1|GK000010.2	7654819	T	G	0	2	0	1
gnl|UMD3.1|GK000010.2	7654827	G	A	0	2	0	1
gnl|UMD3.1|GK000010.2	7655003	T	A	0	2	0	1
gnl|UMD3.1|GK000010.2	7655006	T	A	0	2	0	1
gnl|UMD3.1|GK000010.2	7655206	G	A	0	5	0	1
gnl|UMD3.1|GK000010.2	7655231	T	C	0	4	0	1
gnl|UMD3.1|GK000010.2	7655792	T	G	0	2	0	1
gnl|UMD3.1|GK000010.2	7656155	G	A	0	2	0	1
gnl|UMD3.1|GK000010.2	7656197	T	C	0	4	0	1
gnl|UMD3.1|GK000010.2	7656227	G	A	0	4	0	1
gnl|UMD3.1|GK000010.2	7658030	G	A	0	2	0	1
gnl|UMD3.1|GK000010.2	7658081	T	G	0	2	0	1
gnl|UMD3.1|GK000010.2	7660405	G	A	0	2	0	1
gnl|UMD3.1|GK000010.2	7660454	G	A	0	2	0	1
gnl|UMD3.1|GK000010.2	7660482	C	T	0	2	0	1
gnl|UMD3.1|GK000010.2	7660495	G	C	1	2	0.333333	0.666667
gnl|UMD3.1|GK000010.2	7660506	G	A	0	2	0	1
gnl|UMD3.1|GK000010.2	7675240	C	T	0	2	0	1
gnl|UMD3.1|GK000010.2	7675316	A	G	0	2	0	1
gnl|UMD3.1|GK000010.2	7681895	T	G	0	3	0	1
gnl|UMD3.1|GK000010.2	7681905	A	G	0	3	0	1
gnl|UMD3.1|GK000010.2	7683474	A	G	1	2	0.333333	0.666667
gnl|UMD3.1|GK000010.2	7684937	A	C	0	4	0	1
gnl|UMD3.1|GK000010.2	7698002	C	T	0	2	0	1
gnl|UMD3.1|GK000010.2	7698194	T	C	0	2	0	1
gnl|UMD3.1|GK000010.2	7701824	A	G	0	2	0	1
gnl|UMD3.1|GK000010.2	7702777	G	T	0	2	0	1
gnl|UMD3.1|GK000010.2	7703943	C	T	0	2	0	1
gnl|UMD3.1|GK000010.2	7708061	A	G	2	2	0.5	0.5
gnl|UMD3.1|GK000010.2	7708083	A	G	2	2	0.5	0.5
gnl|UMD3.1|GK000010.2	7708089	A	G	2	2	0.5	0.5
gnl|UMD3.1|GK000010.2	7708111	A	G	1	2	0.333333	0.666667
gnl|UMD3.1|GK000010.2	7710118	A	G	0	3	0	1
gnl|UMD3.1|GK000010.2	7713694	T	G	0	2	0	1
gnl|UMD3.1|GK000010.2	7735026	C	G	0	2	0	1
gnl|UMD3.1|GK000010.2	7735084	G	A	0	2	0	1
gnl|UMD3.1|GK000010.2	7735612	A	G	0	2	0	1
gnl|UMD3.1|GK000010.2	7738067	C	G	0	2	0	1
gnl|UMD3.1|GK000010.2	7740688	T	G	2	2	0.5	0.5
gnl|UMD3.1|GK000010.2	7740776	G	A	0	2	0	1
gnl|UMD3.1|GK000010.2	7743391	A	G	0	2	0	1
gnl|UMD3.1|GK000010.2	7743645	T	C	0	2	0	1
gnl|UMD3.1|GK000010.2	7748853	T	A	0	2	0	1
gnl|UMD3.1|GK000010.2	7748896	A	G	0	2	0	1
gnl|UMD3.1|GK000010.2	7750570	G	A	0	1	0	1
gnl|UMD3.1|GK000010.2	7754239	C	T	0	3	0	1
gnl|UMD3.1|GK000010.2	7754428	T	C	0	1	0	1
gnl|UMD3.1|GK000010.2	7755598	A	G	0	2	0	1
gnl|UMD3.1|GK000010.2	7755610	C	T	0	2	0	1
gnl|UMD3.1|GK000010.2	7755635	A	G	0	2	0	1
gnl|UMD3.1|GK000010.2	7755645	C	T	0	2	0	1
gnl|UMD3.1|GK000010.2	7777870	G	T	0	3	0	1
gnl|UMD3.1|GK000010.2	7777917	T	C	0	5	0	1
gnl|UMD3.1|GK000010.2	7777957	C	T	0	6	0	1
gnl|UMD3.1|GK000010.2	7778086	G	A	0	3	0	1
gnl|UMD3.1|GK000010.2	7778134	A	G	0	4	0	1
gnl|UMD3.1|GK000010.2	7778277	A	G	0	3	0	1
gnl|UMD3.1|GK000010.2	7778290	G	A	0	3	0	1
gnl|UMD3.1|GK000010.2	7778397	T	C	0	2	0	1
gnl|UMD3.1|GK000010.2	7778506	A	G	0	5	0	1
gnl|UMD3.1|GK000010.2	7778565	T	C	0	4	0	1
gnl|UMD3.1|GK000010.2	7778591	T	A	0	3	0	1
gnl|UMD3.1|GK000010.2	7778721	T	A	0	2	0	1
gnl|UMD3.1|GK000010.2	7778756	G	A	0	2	0	1
gnl|UMD3.1|GK000010.2	7786365	C	G	0	3	0	1
gnl|UMD3.1|GK000010.2	7786390	C	G	0	3	0	1
gnl|UMD3.1|GK000010.2	7788947	A	G	0	2	0	1
gnl|UMD3.1|GK000010.2	7789457	A	G	0	2	0	1
gnl|UMD3.1|GK000010.2	7791287	A	G	0	2	0	1
gnl|UMD3.1|GK000010.2	7791840	T	G	0	2	0	1
gnl|UMD3.1|GK000010.2	7802531	G	A	0	2	0	1
gnl|UMD3.1|GK000010.2	7802666	A	G	0	2	0	1
gnl|UMD3.1|GK000010.2	7802685	A	T	0	3	0	1
gnl|UMD3.1|GK000010.2	7806525	C	T	0	2	0	1
gnl|UMD3.1|GK000010.2	7806559	T	C	0	2	0	1
gnl|UMD3.1|GK000010.2	7806603	A	C	0	2	0	1
gnl|UMD3.1|GK000010.2	7806608	G	A	0	2	0	1
gnl|UMD3.1|GK000010.2	7807403	T	C	0	2	0	1
gnl|UMD3.1|GK000010.2	7809825	G	A	0	1	0	1
gnl|UMD3.1|GK000010.2	7809829	T	C	0	2	0	1
gnl|UMD3.1|GK000010.2	7809871	C	T	0	2	0	1
gnl|UMD3.1|GK000010.2	7809872	A	C	0	2	0	1
gnl|UMD3.1|GK000010.2	7809885	A	G	0	2	0	1
gnl|UMD3.1|GK000010.2	7810016	C	T	0	2	0	1
gnl|UMD3.1|GK000010.2	7810831	A	G	0	2	0	1
gnl|UMD3.1|GK000010.2	7810844	G	A	0	2	0	1
gnl|UMD3.1|GK000010.2	7810903	G	A	0	2	0	1
gnl|UMD3.1|GK000010.2	7810911	A	G	0	2	0	1
gnl|UMD3.1|GK000010.2	7810917	A	T	0	2	0	1
gnl|UMD3.1|GK000010.2	7810919	G	A	0	2	0	1
gnl|UMD3.1|GK000010.2	7815282	G	A	0	2	0	1
gnl|UMD3.1|GK000010.2	7820866	A	G	0	2	0	1
gnl|UMD3.1|GK000010.2	7827467	G	C	1	2	0.333333	0.666667
gnl|UMD3.1|GK000010.2	7827482	A	C	0	3	0	1
gnl|UMD3.1|GK000010.2	7827497	C	T	0	2	0	1
gnl|UMD3.1|GK000010.2	7829495	G	T	0	2	0	1
gnl|UMD3.1|GK000010.2	7829501	A	G	0	2	0	1
gnl|UMD3.1|GK000010.2	7829566	T	C	0	4	0	1
gnl|UMD3.1|GK000010.2	7835051	C	G	2	2	0.5	0.5
gnl|UMD3.1|GK000010.2	7835728	T	C	4	2	0.666667	0.333333
gnl|UMD3.1|GK000010.2	7835791	G	A	5	5	0.5	0.5
gnl|UMD3.1|GK000010.2	7838336	C	T	0	2	0	1
gnl|UMD3.1|GK000010.2	7838858	G	T	0	3	0	1
gnl|UMD3.1|GK000010.2	7841517	C	A	1	2	0.333333	0.666667
gnl|UMD3.1|GK000010.2	7845823	C	A	0	2	0	1
gnl|UMD3.1|GK000010.2	7846520	G	A	0	2	0	1
gnl|UMD3.1|GK000010.2	7850236	T	A	0	2	0	1
gnl|UMD3.1|GK000010.2	7862984	T	G	1	2	0.333333	0.666667
gnl|UMD3.1|GK000010.2	7863411	T	C	4	2	0.666667	0.333333
gnl|UMD3.1|GK000010.2	7863445	G	T	5	2	0.714286	0.285714
gnl|UMD3.1|GK000010.2	7867655	T	A	7	2	0.777778	0.222222
gnl|UMD3.1|GK000010.2	7867760	T	C	2	4	0.333333	0.666667
gnl|UMD3.1|GK000010.2	7893960	T	C	2	2	0.5	0.5
gnl|UMD3.1|GK000010.2	7894323	G	A	4	4	0.5	0.5
gnl|UMD3.1|GK000010.2	7894919	G	T	5	4	0.555556	0.444444
gnl|UMD3.1|GK000010.2	7895208	G	A	4	3	0.571429	0.428571
gnl|UMD3.1|GK000010.2	7895258	G	C	5	7	0.416667	0.583333
gnl|UMD3.1|GK000010.2	8009450	A	G	0	2	0	1
gnl|UMD3.1|GK000010.2	8009470	A	T	0	2	0	1
gnl|UMD3.1|GK000010.2	8009474	A	G	0	2	0	1
gnl|UMD3.1|GK000010.2	8009476	G	A	0	2	0	1
gnl|UMD3.1|GK000010.2	8009478	A	G	0	2	0	1
gnl|UMD3.1|GK000010.2	8009502	G	A	0	2	0	1
gnl|UMD3.1|GK000010.2	8009532	T	C	0	2	0	1
gnl|UMD3.1|GK000010.2	8009550	G	A	0	2	0	1
gnl|UMD3.1|GK000010.2	8010292	C	T	0	3	0	1
gnl|UMD3.1|GK000010.2	8010303	C	T	0	3	0	1
gnl|UMD3.1|GK000010.2	8010309	G	T	0	3	0	1
gnl|UMD3.1|GK000010.2	8010316	T	A	0	3	0	1
gnl|UMD3.1|GK000010.2	8120087	C	A	0	6	0	1
gnl|UMD3.1|GK000010.2	8121321	C	T	0	2	0	1
gnl|UMD3.1|GK000010.2	8121955	A	G	0	2	0	1
gnl|UMD3.1|GK000010.2	8121978	G	A	0	1	0	1
gnl|UMD3.1|GK000010.2	8124579	A	G	0	2	0	1
gnl|UMD3.1|GK000010.2	8126042	G	A	0	2	0	1
gnl|UMD3.1|GK000010.2	8128591	A	C	0	2	0	1
gnl|UMD3.1|GK000010.2	8128874	C	T	0	2	0	1
gnl|UMD3.1|GK000010.2	8129815	A	G	0	2	0	1
gnl|UMD3.1|GK000010.2	8130920	G	C	0	2	0	1
gnl|UMD3.1|GK000010.2	8132033	T	A	0	2	0	1
gnl|UMD3.1|GK000010.2	8132077	G	T	0	2	0	1
gnl|UMD3.1|GK000010.2	8132181	T	G	0	3	0	1
gnl|UMD3.1|GK000010.2	8132222	A	G	0	2	0	1
gnl|UMD3.1|GK000010.2	8132225	A	G	0	2	0	1
gnl|UMD3.1|GK000010.2	8133043	C	T	0	2	0	1
gnl|UMD3.1|GK000010.2	8133076	G	T	0	2	0	1
gnl|UMD3.1|GK000010.2	8134891	G	A	0	2	0	1
gnl|UMD3.1|GK000010.2	8136324	G	A	0	2	0	1
gnl|UMD3.1|GK000010.2	8138100	T	A	0	5	0	1
gnl|UMD3.1|GK000010.2	8139881	C	T	40	31	0.56338	0.43662
gnl|UMD3.1|GK000010.2	8140171	T	A	8	39	0.170213	0.829787
gnl|UMD3.1|GK000010.2	8140226	C	T	5	15	0.25	0.75
gnl|UMD3.1|GK000010.2	8141318	T	C	0	5	0	1
gnl|UMD3.1|GK000010.2	8141920	G	T	0	2	0	1
gnl|UMD3.1|GK000010.2	8142011	T	G	0	3	0	1
gnl|UMD3.1|GK000010.2	8147503	T	C	0	3	0	1
gnl|UMD3.1|GK000010.2	8147913	A	T	1	13	0.0714286	0.928571
gnl|UMD3.1|GK000010.2	8148314	T	C	9	4	0.692308	0.307692
gnl|UMD3.1|GK000010.2	8148614	T	A	3	2	0.6	0.4
gnl|UMD3.1|GK000010.2	8149332	G	C	0	9	0	1
gnl|UMD3.1|GK000010.2	8149465	T	G	2	3	0.4	0.6
gnl|UMD3.1|GK000010.2	8149538	A	G	0	11	0	1
gnl|UMD3.1|GK000010.2	8149838	G	T	0	12	0	1
gnl|UMD3.1|GK000010.2	8150118	G	A	0	17	0	1
gnl|UMD3.1|GK000010.2	8150622	G	A	0	13	0	1
gnl|UMD3.1|GK000010.2	8157251	A	C	0	22	0	1
gnl|UMD3.1|GK000010.2	8157700	C	T	11	11	0.5	0.5
gnl|UMD3.1|GK000010.2	8157887	G	A	18	10	0.642857	0.357143
gnl|UMD3.1|GK000010.2	8157927	C	T	8	20	0.285714	0.714286
gnl|UMD3.1|GK000010.2	8157942	T	C	0	32	0	1
gnl|UMD3.1|GK000010.2	8158077	C	A	3	3	0.5	0.5
gnl|UMD3.1|GK000010.2	8158166	G	T	4	4	0.5	0.5
gnl|UMD3.1|GK000010.2	8158818	T	A	3	2	0.6	0.4
gnl|UMD3.1|GK000010.2	8158892	C	G	0	3	0	1
gnl|UMD3.1|GK000010.2	8161465	C	T	2	2	0.5	0.5
gnl|UMD3.1|GK000010.2	8161955	A	G	0	2	0	1
gnl|UMD3.1|GK000010.2	8164575	T	C	0	2	0	1
gnl|UMD3.1|GK000010.2	8165603	C	T	0	2	0	1
gnl|UMD3.1|GK000010.2	8165679	T	C	0	3	0	1
gnl|UMD3.1|GK000010.2	8165894	A	G	0	5	0	1
gnl|UMD3.1|GK000010.2	8167738	T	C	4	2	0.666667	0.333333
gnl|UMD3.1|GK000010.2	8168702	T	C	0	2	0	1
gnl|UMD3.1|GK000010.2	8171865	A	G	0	2	0	1
gnl|UMD3.1|GK000010.2	8173059	C	T	0	2	0	1
gnl|UMD3.1|GK000010.2	8174719	T	C	0	9	0	1
gnl|UMD3.1|GK000010.2	8174820	A	G	0	3	0	1
gnl|UMD3.1|GK000010.2	8175005	T	G	0	2	0	1
gnl|UMD3.1|GK000010.2	8175516	G	A	0	5	0	1
gnl|UMD3.1|GK000010.2	8175896	T	C	0	3	0	1
gnl|UMD3.1|GK000010.2	8175952	A	C	1	3	0.25	0.75
gnl|UMD3.1|GK000010.2	8178766	C	T	1	3	0.25	0.75
gnl|UMD3.1|GK000010.2	8178854	G	A	0	3	0	1
gnl|UMD3.1|GK000010.2	8178950	A	G	0	2	0	1
gnl|UMD3.1|GK000010.2	8179141	A	G	0	2	0	1
gnl|UMD3.1|GK000010.2	8179578	C	T	0	2	0	1
gnl|UMD3.1|GK000010.2	8179785	A	G	0	2	0	1
gnl|UMD3.1|GK000010.2	8180222	A	G	0	2	0	1
gnl|UMD3.1|GK000010.2	8181061	C	T	0	3	0	1
gnl|UMD3.1|GK000010.2	8184151	A	G	0	2	0	1
gnl|UMD3.1|GK000010.2	8184576	A	T	0	5	0	1
gnl|UMD3.1|GK000010.2	8184674	T	C	3	2	0.6	0.4
gnl|UMD3.1|GK000010.2	8186412	A	G	0	2	0	1
gnl|UMD3.1|GK000010.2	8187680	G	C	0	2	0	1
gnl|UMD3.1|GK000010.2	8187722	C	A	0	2	0	1
gnl|UMD3.1|GK000010.2	8272393	T	A	0	2	0	1
gnl|UMD3.1|GK000010.2	8292961	T	C	0	2	0	1
gnl|UMD3.1|GK000010.2	8304617	T	C	0	4	0	1
gnl|UMD3.1|GK000010.2	8304641	T	C	0	3	0	1
gnl|UMD3.1|GK000010.2	8307023	C	T	0	3	0	1
gnl|UMD3.1|GK000010.2	8307608	C	A	1	3	0.25	0.75
gnl|UMD3.1|GK000010.2	8312186	T	C	0	2	0	1
gnl|UMD3.1|GK000010.2	8312352	T	C	0	5	0	1
gnl|UMD3.1|GK000010.2	8312354	A	G	3	2	0.6	0.4
gnl|UMD3.1|GK000010.2	8313062	T	C	0	2	0	1
gnl|UMD3.1|GK000010.2	8313739	C	T	0	2	0	1
gnl|UMD3.1|GK000010.2	8313884	C	T	0	2	0	1
gnl|UMD3.1|GK000010.2	8313992	A	G	0	3	0	1
gnl|UMD3.1|GK000010.2	8314072	C	T	0	4	0	1
gnl|UMD3.1|GK000010.2	8314330	A	G	0	4	0	1
gnl|UMD3.1|GK000010.2	8315113	T	C	0	2	0	1
gnl|UMD3.1|GK000010.2	8315127	T	C	0	1	0	1
gnl|UMD3.1|GK000010.2	8316408	C	T	0	3	0	1
gnl|UMD3.1|GK000010.2	8316443	A	G	0	2	0	1
gnl|UMD3.1|GK000010.2	8316495	T	A	1	2	0.333333	0.666667
gnl|UMD3.1|GK000010.2	8316637	C	A	0	2	0	1
gnl|UMD3.1|GK000010.2	8316824	G	C	0	2	0	1
gnl|UMD3.1|GK000010.2	8318755	A	C	0	4	0	1
gnl|UMD3.1|GK000010.2	8321045	A	C	0	5	0	1
gnl|UMD3.1|GK000010.2	8321072	A	G	3	2	0.6	0.4
gnl|UMD3.1|GK000010.2	8321074	A	G	2	3	0.4	0.6
gnl|UMD3.1|GK000010.2	8321077	A	G	2	2	0.5	0.5
gnl|UMD3.1|GK000010.2	8321484	G	A	0	2	0	1
gnl|UMD3.1|GK000010.2	8321617	T	C	0	4	0	1
gnl|UMD3.1|GK000010.2	8321683	A	G	0	2	0	1
gnl|UMD3.1|GK000010.2	8325722	C	T	0	2	0	1
gnl|UMD3.1|GK000010.2	8326139	G	C	0	2	0	1
gnl|UMD3.1|GK000010.2	8326194	T	C	0	2	0	1
gnl|UMD3.1|GK000010.2	8326323	T	A	0	3	0	1
gnl|UMD3.1|GK000010.2	8326329	A	G	0	4	0	1
gnl|UMD3.1|GK000010.2	8327209	A	G	0	3	0	1
gnl|UMD3.1|GK000010.2	8327418	A	G	0	3	0	1
gnl|UMD3.1|GK000010.2	8329513	T	G	0	3	0	1
gnl|UMD3.1|GK000010.2	8330319	A	G	0	2	0	1
gnl|UMD3.1|GK000010.2	8330506	G	T	0	2	0	1
gnl|UMD3.1|GK000010.2	8333024	G	A	0	3	0	1
gnl|UMD3.1|GK000010.2	8333115	C	T	0	4	0	1
gnl|UMD3.1|GK000010.2	8333384	G	A	0	2	0	1
gnl|UMD3.1|GK000010.2	8334379	A	T	0	2	0	1
gnl|UMD3.1|GK000010.2	8334872	C	A	0	3	0	1
gnl|UMD3.1|GK000010.2	8334946	C	G	0	2	0	1
gnl|UMD3.1|GK000010.2	8335045	G	A	0	2	0	1
gnl|UMD3.1|GK000010.2	8335832	A	C	0	2	0	1
gnl|UMD3.1|GK000010.2	8335894	A	G	0	2	0	1
gnl|UMD3.1|GK000010.2	8335947	C	A	0	2	0	1
gnl|UMD3.1|GK000010.2	8336080	G	T	0	2	0	1
gnl|UMD3.1|GK000010.2	8338237	G	A	0	2	0	1
gnl|UMD3.1|GK000010.2	8338969	C	T	0	2	0	1
gnl|UMD3.1|GK000010.2	8342881	A	G	0	2	0	1
gnl|UMD3.1|GK000010.2	8342889	A	G	0	2	0	1
gnl|UMD3.1|GK000010.2	8344112	G	A	0	3	0	1
gnl|UMD3.1|GK000010.2	8346505	C	A	0	2	0	1
gnl|UMD3.1|GK000010.2	8347436	G	T	1	2	0.333333	0.666667
gnl|UMD3.1|GK000010.2	8347952	C	T	0	2	0	1
gnl|UMD3.1|GK000010.2	8350184	A	G	1	2	0.333333	0.666667
gnl|UMD3.1|GK000010.2	8350185	A	G	1	2	0.333333	0.666667
gnl|UMD3.1|GK000010.2	8350211	A	G	1	2	0.333333	0.666667
gnl|UMD3.1|GK000010.2	8350215	A	G	1	2	0.333333	0.666667
gnl|UMD3.1|GK000010.2	8350269	A	G	0	2	0	1
gnl|UMD3.1|GK000010.2	8358093	T	C	0	2	0	1
gnl|UMD3.1|GK000010.2	8362897	A	G	0	2	0	1
gnl|UMD3.1|GK000010.2	8363332	C	T	0	3	0	1
gnl|UMD3.1|GK000010.2	8363335	T	C	0	3	0	1
gnl|UMD3.1|GK000010.2	8364415	T	C	0	2	0	1
gnl|UMD3.1|GK000010.2	8364732	G	A	0	2	0	1
gnl|UMD3.1|GK000010.2	8364766	G	A	0	2	0	1
gnl|UMD3.1|GK000010.2	8365231	A	G	0	2	0	1
gnl|UMD3.1|GK000010.2	8365302	G	A	0	3	0	1
gnl|UMD3.1|GK000010.2	8365305	G	T	0	4	0	1
gnl|UMD3.1|GK000010.2	8367769	C	T	0	2	0	1
gnl|UMD3.1|GK000010.2	8367849	G	A	0	2	0	1
gnl|UMD3.1|GK000010.2	8368535	T	C	0	2	0	1
gnl|UMD3.1|GK000010.2	8368958	T	C	0	2	0	1
gnl|UMD3.1|GK000010.2	8368969	C	A	0	2	0	1
gnl|UMD3.1|GK000010.2	8369449	A	T	0	3	0	1
gnl|UMD3.1|GK000010.2	8369642	A	G	0	3	0	1
gnl|UMD3.1|GK000010.2	8369687	T	G	0	3	0	1
gnl|UMD3.1|GK000010.2	8373065	G	A	2	3	0.4	0.6
gnl|UMD3.1|GK000010.2	8374850	A	G	0	2	0	1
gnl|UMD3.1|GK000010.2	8381364	A	C	0	3	0	1
gnl|UMD3.1|GK000010.2	8385614	T	G	0	2	0	1
gnl|UMD3.1|GK000010.2	8386497	T	C	0	2	0	1
gnl|UMD3.1|GK000010.2	8388841	A	G	0	2	0	1
gnl|UMD3.1|GK000010.2	8399666	G	A	0	3	0	1
gnl|UMD3.1|GK000010.2	8404488	G	T	1	2	0.333333	0.666667
gnl|UMD3.1|GK000010.2	8404687	A	G	0	2	0	1
gnl|UMD3.1|GK000010.2	8404730	A	G	0	2	0	1
gnl|UMD3.1|GK000010.2	8404731	A	G	0	2	0	1
gnl|UMD3.1|GK000010.2	8404811	A	G	0	1	0	1
gnl|UMD3.1|GK000010.2	8406677	A	G	4	2	0.666667	0.333333
gnl|UMD3.1|GK000010.2	8406685	A	G	1	5	0.166667	0.833333
gnl|UMD3.1|GK000010.2	8406711	A	G	0	5	0	1
gnl|UMD3.1|GK000010.2	8406716	A	G	4	2	0.666667	0.333333
gnl|UMD3.1|GK000010.2	8406717	A	G	0	6	0	1
gnl|UMD3.1|GK000010.2	8406718	A	G	4	2	0.666667	0.333333
gnl|UMD3.1|GK000010.2	8406733	A	G	2	5	0.285714	0.714286
gnl|UMD3.1|GK000010.2	8406749	A	G	3	4	0.428571	0.571429
gnl|UMD3.1|GK000010.2	8406785	G	A	0	8	0	1
gnl|UMD3.1|GK000010.2	8407075	G	T	0	2	0	1
gnl|UMD3.1|GK000010.2	8409563	A	G	0	4	0	1
gnl|UMD3.1|GK000010.2	8409590	G	T	0	4	0	1
gnl|UMD3.1|GK000010.2	8410154	T	C	2	2	0.5	0.5
gnl|UMD3.1|GK000010.2	8412093	C	T	0	2	0	1
gnl|UMD3.1|GK000010.2	8412350	G	A	0	3	0	1
gnl|UMD3.1|GK000010.2	8412362	G	A	0	3	0	1
gnl|UMD3.1|GK000010.2	8412390	T	C	0	3	0	1
gnl|UMD3.1|GK000010.2	8414818	G	A	0	1	0	1
gnl|UMD3.1|GK000010.2	8417376	A	C	0	3	0	1
gnl|UMD3.1|GK000010.2	8417407	G	A	0	3	0	1
gnl|UMD3.1|GK000010.2	8418855	T	C	0	4	0	1
gnl|UMD3.1|GK000010.2	8431921	A	G	0	4	0	1
gnl|UMD3.1|GK000010.2	8432020	A	C	2	2	0.5	0.5
gnl|UMD3.1|GK000010.2	8433818	A	G	0	2	0	1
gnl|UMD3.1|GK000010.2	8436273	C	A	1	2	0.333333	0.666667
gnl|UMD3.1|GK000010.2	8443266	A	T	0	2	0	1
gnl|UMD3.1|GK000010.2	8443777	A	C	0	2	0	1
gnl|UMD3.1|GK000010.2	8457276	A	G	0	4	0	1
gnl|UMD3.1|GK000010.2	8457297	T	C	0	4	0	1
gnl|UMD3.1|GK000010.2	8463447	C	A	5	2	0.714286	0.285714
gnl|UMD3.1|GK000010.2	8463787	C	T	0	4	0	1
gnl|UMD3.1|GK000010.2	8463792	T	C	0	5	0	1
gnl|UMD3.1|GK000010.2	8463872	G	A	0	3	0	1
gnl|UMD3.1|GK000010.2	8463982	A	G	0	3	0	1
gnl|UMD3.1|GK000010.2	8463994	A	G	0	3	0	1
gnl|UMD3.1|GK000010.2	8465197	C	T	0	2	0	1
gnl|UMD3.1|GK000010.2	8465369	C	T	0	3	0	1
gnl|UMD3.1|GK000010.2	8465730	G	A	0	2	0	1
gnl|UMD3.1|GK000010.2	8465749	G	A	0	2	0	1
gnl|UMD3.1|GK000010.2	8465863	T	C	0	2	0	1
gnl|UMD3.1|GK000010.2	8467029	G	A	1	2	0.333333	0.666667
gnl|UMD3.1|GK000010.2	8467837	C	T	1	3	0.25	0.75
gnl|UMD3.1|GK000010.2	8467852	G	A	1	3	0.25	0.75
gnl|UMD3.1|GK000010.2	8468563	G	A	0	2	0	1
gnl|UMD3.1|GK000010.2	8468606	A	G	0	2	0	1
gnl|UMD3.1|GK000010.2	8469315	C	T	1	4	0.2	0.8
gnl|UMD3.1|GK000010.2	8469404	T	C	0	2	0	1
gnl|UMD3.1|GK000010.2	8469458	C	T	1	2	0.333333	0.666667
gnl|UMD3.1|GK000010.2	8469709	T	C	1	5	0.166667	0.833333
gnl|UMD3.1|GK000010.2	8469805	T	C	1	2	0.333333	0.666667
gnl|UMD3.1|GK000010.2	8469824	T	C	0	2	0	1
gnl|UMD3.1|GK000010.2	8469876	G	A	2	2	0.5	0.5
gnl|UMD3.1|GK000010.2	8469994	G	A	1	2	0.333333	0.666667
gnl|UMD3.1|GK000010.2	8470010	T	C	1	2	0.333333	0.666667
gnl|UMD3.1|GK000010.2	8471579	G	T	0	2	0	1
gnl|UMD3.1|GK000010.2	8471722	A	G	0	5	0	1
gnl|UMD3.1|GK000010.2	8473013	G	C	0	3	0	1
gnl|UMD3.1|GK000010.2	8473495	C	A	1	2	0.333333	0.666667
gnl|UMD3.1|GK000010.2	8475268	A	G	0	3	0	1
gnl|UMD3.1|GK000010.2	8475608	G	A	0	2	0	1
gnl|UMD3.1|GK000010.2	8477719	T	C	2	2	0.5	0.5
gnl|UMD3.1|GK000010.2	8478640	C	T	0	2	0	1
gnl|UMD3.1|GK000010.2	8478701	C	G	0	2	0	1
gnl|UMD3.1|GK000010.2	8478726	G	C	0	3	0	1
gnl|UMD3.1|GK000010.2	8478762	C	G	0	2	0	1
gnl|UMD3.1|GK000010.2	8479179	A	G	0	2	0	1
gnl|UMD3.1|GK000010.2	8479915	T	C	0	2	0	1
gnl|UMD3.1|GK000010.2	8479935	A	G	0	2	0	1
gnl|UMD3.1|GK000010.2	8480228	C	T	0	6	0	1
gnl|UMD3.1|GK000010.2	8480315	T	C	0	4	0	1
gnl|UMD3.1|GK000010.2	8480337	T	C	0	4	0	1
gnl|UMD3.1|GK000010.2	8480354	C	T	0	3	0	1
gnl|UMD3.1|GK000010.2	8480496	C	A	0	2	0	1
gnl|UMD3.1|GK000010.2	8480521	A	G	0	2	0	1
gnl|UMD3.1|GK000010.2	8480548	G	A	0	3	0	1
gnl|UMD3.1|GK000010.2	8480627	T	C	0	4	0	1
gnl|UMD3.1|GK000010.2	8480674	A	G	0	4	0	1
gnl|UMD3.1|GK000010.2	8480703	A	C	0	4	0	1
gnl|UMD3.1|GK000010.2	8481011	C	T	0	2	0	1
gnl|UMD3.1|GK000010.2	8481141	C	T	0	4	0	1
gnl|UMD3.1|GK000010.2	8481144	T	C	0	4	0	1
gnl|UMD3.1|GK000010.2	8481188	T	C	0	4	0	1
gnl|UMD3.1|GK000010.2	8481189	G	A	0	4	0	1
gnl|UMD3.1|GK000010.2	8481277	G	A	2	2	0.5	0.5
gnl|UMD3.1|GK000010.2	8481340	C	T	0	4	0	1
gnl|UMD3.1|GK000010.2	8481472	C	T	0	2	0	1
gnl|UMD3.1|GK000010.2	8481586	T	C	0	3	0	1
gnl|UMD3.1|GK000010.2	8481972	T	C	0	2	0	1
gnl|UMD3.1|GK000010.2	8481994	C	T	0	2	0	1
gnl|UMD3.1|GK000010.2	8482410	G	A	0	5	0	1
gnl|UMD3.1|GK000010.2	8482531	C	T	0	3	0	1
gnl|UMD3.1|GK000010.2	8482540	C	T	0	4	0	1
gnl|UMD3.1|GK000010.2	8482806	G	T	0	2	0	1
gnl|UMD3.1|GK000010.2	8483002	C	T	1	2	0.333333	0.666667
gnl|UMD3.1|GK000010.2	8483356	G	A	0	4	0	1
gnl|UMD3.1|GK000010.2	8483457	A	T	0	2	0	1
gnl|UMD3.1|GK000010.2	8483995	G	A	0	2	0	1
gnl|UMD3.1|GK000010.2	8484254	G	A	0	2	0	1
gnl|UMD3.1|GK000010.2	8484382	G	T	0	2	0	1
gnl|UMD3.1|GK000010.2	8484929	T	C	0	2	0	1
gnl|UMD3.1|GK000010.2	8484979	G	A	0	2	0	1
gnl|UMD3.1|GK000010.2	8485671	C	A	2	2	0.5	0.5
gnl|UMD3.1|GK000010.2	8485679	A	G	2	2	0.5	0.5
gnl|UMD3.1|GK000010.2	8485736	G	C	0	2	0	1
gnl|UMD3.1|GK000010.2	8485892	A	C	0	4	0	1
gnl|UMD3.1|GK000010.2	8486135	A	G	0	2	0	1
gnl|UMD3.1|GK000010.2	8486503	T	C	0	2	0	1
gnl|UMD3.1|GK000010.2	8486850	T	G	0	2	0	1
gnl|UMD3.1|GK000010.2	8486853	A	G	0	2	0	1
gnl|UMD3.1|GK000010.2	8487055	T	C	0	2	0	1
gnl|UMD3.1|GK000010.2	8487062	G	A	0	2	0	1
gnl|UMD3.1|GK000010.2	8487213	C	A	0	2	0	1
gnl|UMD3.1|GK000010.2	8487596	A	G	0	2	0	1
gnl|UMD3.1|GK000010.2	8487706	G	T	0	2	0	1
gnl|UMD3.1|GK000010.2	8487776	G	T	1	2	0.333333	0.666667
gnl|UMD3.1|GK000010.2	8487939	C	T	0	2	0	1
gnl|UMD3.1|GK000010.2	8488045	A	T	0	2	0	1
gnl|UMD3.1|GK000010.2	8488048	G	A	0	2	0	1
gnl|UMD3.1|GK000010.2	8488062	C	T	0	2	0	1
gnl|UMD3.1|GK000010.2	8488206	C	G	0	2	0	1
gnl|UMD3.1|GK000010.2	8488211	A	C	0	2	0	1
gnl|UMD3.1|GK000010.2	8488917	G	A	0	2	0	1
gnl|UMD3.1|GK000010.2	8488973	A	G	0	2	0	1
gnl|UMD3.1|GK000010.2	8489020	G	A	0	3	0	1
gnl|UMD3.1|GK000010.2	8489538	G	A	0	2	0	1
gnl|UMD3.1|GK000010.2	8489568	G	A	0	2	0	1
gnl|UMD3.1|GK000010.2	8490263	G	C	0	2	0	1
gnl|UMD3.1|GK000010.2	8490795	G	A	0	2	0	1
gnl|UMD3.1|GK000010.2	8490815	C	T	0	2	0	1
gnl|UMD3.1|GK000010.2	8490823	G	A	0	2	0	1
gnl|UMD3.1|GK000010.2	8490891	G	A	0	1	0	1
gnl|UMD3.1|GK000010.2	8490898	A	G	0	2	0	1
gnl|UMD3.1|GK000010.2	8492761	C	T	0	2	0	1
gnl|UMD3.1|GK000010.2	8492828	T	C	0	1	0	1
gnl|UMD3.1|GK000010.2	8494348	C	A	0	2	0	1
gnl|UMD3.1|GK000010.2	8494349	G	C	0	2	0	1
gnl|UMD3.1|GK000010.2	8494354	C	G	0	2	0	1
gnl|UMD3.1|GK000010.2	8494360	C	T	0	2	0	1
gnl|UMD3.1|GK000010.2	8494365	G	C	0	2	0	1
gnl|UMD3.1|GK000010.2	8494579	A	G	0	2	0	1
gnl|UMD3.1|GK000010.2	8494600	C	A	0	3	0	1
gnl|UMD3.1|GK000010.2	8494603	C	A	0	3	0	1
gnl|UMD3.1|GK000010.2	8494616	C	T	0	3	0	1
gnl|UMD3.1|GK000010.2	8494653	A	T	0	3	0	1
gnl|UMD3.1|GK000010.2	8494671	C	T	0	3	0	1
gnl|UMD3.1|GK000010.2	8494679	C	T	0	3	0	1
gnl|UMD3.1|GK000010.2	8494686	T	C	0	4	0	1
gnl|UMD3.1|GK000010.2	8494717	G	A	0	3	0	1
gnl|UMD3.1|GK000010.2	8494731	A	G	2	2	0.5	0.5
gnl|UMD3.1|GK000010.2	8494744	A	G	0	2	0	1
gnl|UMD3.1|GK000010.2	8494745	T	C	0	4	0	1
gnl|UMD3.1|GK000010.2	8494890	T	C	0	3	0	1
gnl|UMD3.1|GK000010.2	8495192	C	T	0	2	0	1
gnl|UMD3.1|GK000010.2	8495214	A	G	0	2	0	1
gnl|UMD3.1|GK000010.2	8495219	C	T	0	2	0	1
gnl|UMD3.1|GK000010.2	8495253	T	C	0	2	0	1
gnl|UMD3.1|GK000010.2	8495271	A	G	0	2	0	1
gnl|UMD3.1|GK000010.2	8495284	A	G	0	2	0	1
gnl|UMD3.1|GK000010.2	8495294	G	A	0	2	0	1
gnl|UMD3.1|GK000010.2	8495501	A	G	0	4	0	1
gnl|UMD3.1|GK000010.2	8495634	G	A	0	4	0	1
gnl|UMD3.1|GK000010.2	8499921	G	T	0	2	0	1
gnl|UMD3.1|GK000010.2	8500567	C	T	0	3	0	1
gnl|UMD3.1|GK000010.2	8500830	C	A	1	1	0.5	0.5
gnl|UMD3.1|GK000010.2	8502120	N	C	0	2	0	1
gnl|UMD3.1|GK000010.2	8502733	G	A	0	2	0	1
[truncated: 549,317+ more rows]
