# Supplementary material for: Single Nucleotide Polymorphism Discovery in Bovine Pituitary Gland Using RNA-Seq Technology
Source: PLoS One. 2016 Sep 8;11(9):e0161370. doi: 10.1371/journal.pone.0161370 (PMC5015895; doi:10.1371/journal.pone.0161370)
Supplement: S22 Table — (XLSX) [file pone.0161370.s022.xlsx]

## Sheet: Sheet1
sTable 22: Screening of SNP type and occurrence in the experimental breed-specific SNP-db.
Breeds / SNP filtering	ANY		Breed-specific		ANY UNIQUE		Breed-specific UNIQUE
	0.9	1	0.9	1	0.9	1	0.9	1
Hereford	94971	88807	9627	4844	40384	39341	157	116
Polish Red	69219	63047	6664	2134	17979	17252	1	1
Polish HF	111378	100382	9771	3174	49238	45303	22	15
Total	275568	252236	26062	10152	107601	101896	179	132
